# Supplementary material
Source: PubMed Central journal article supplement (PMC3406604)

# Association of Chromosome 6 With Blood Pressure Phenotypes in African Americans

SBP

DBP

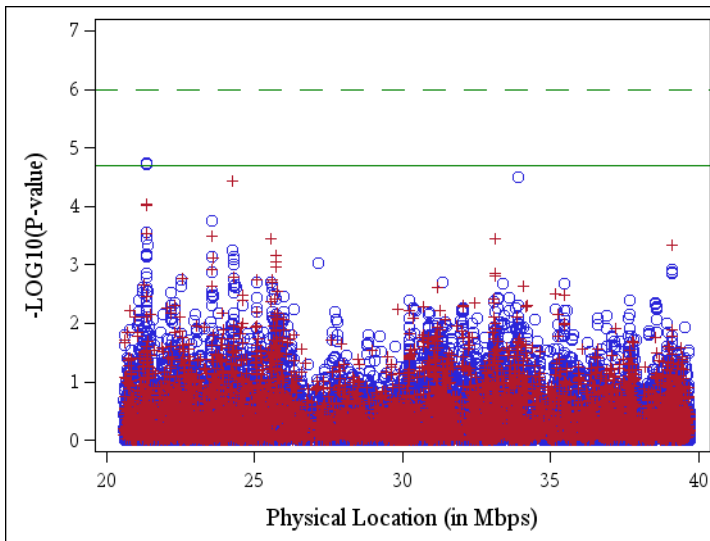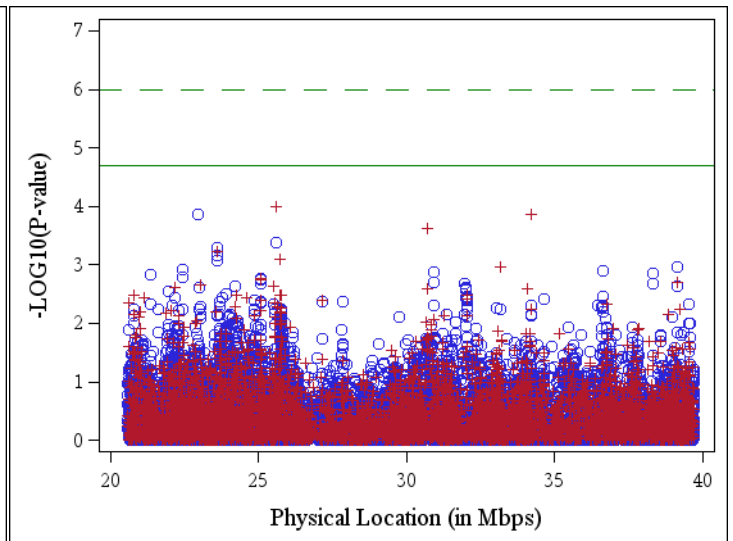

MAP

PP

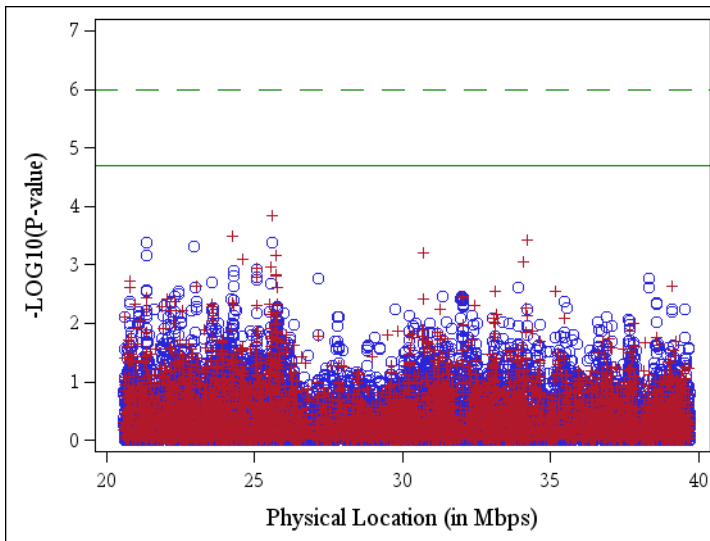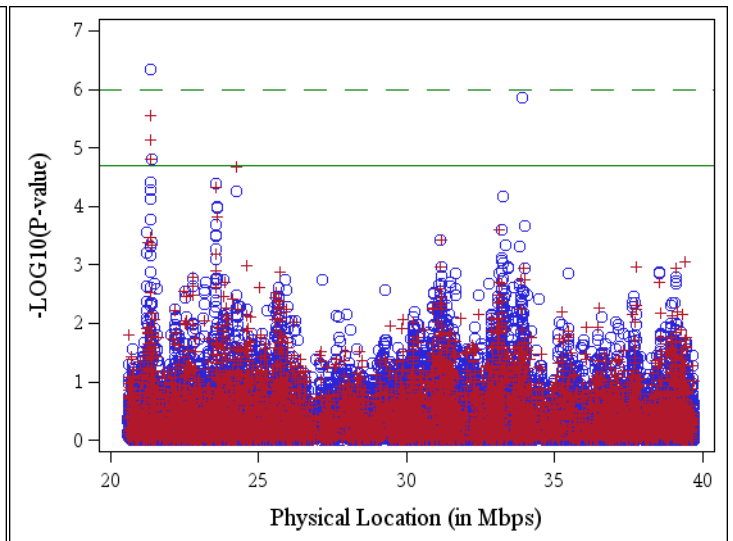

+10 Medication Adjusted SBP

+5 Medication Adjusted DBP

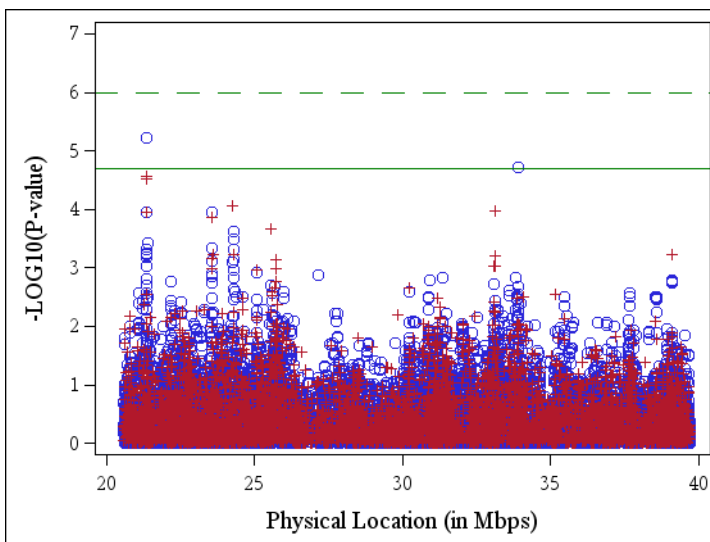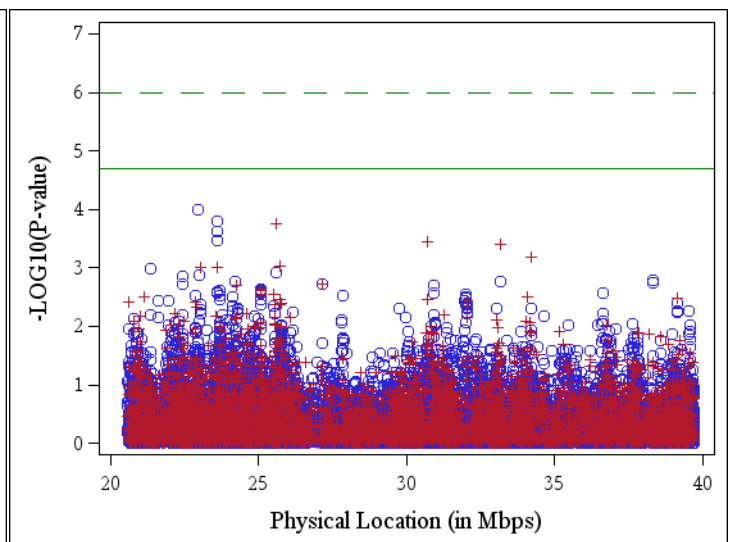

# Continued: Association of Chromosome 6 With Blood Pressure Phenotypes in African Americans

## +10/5 Medication Adjusted MAP

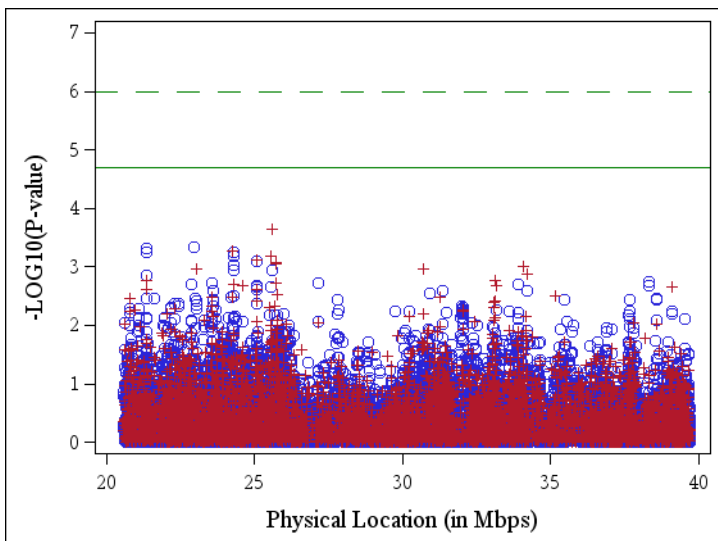

## Medication Adjusted PP

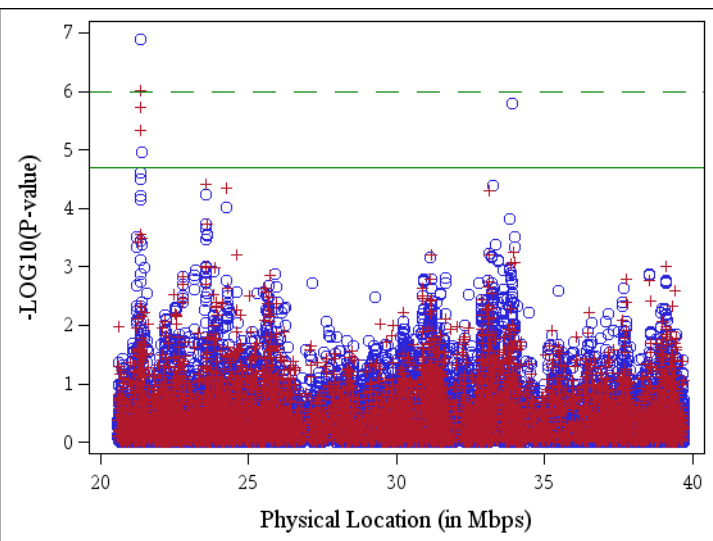

## +15 Medication Adjusted SBP

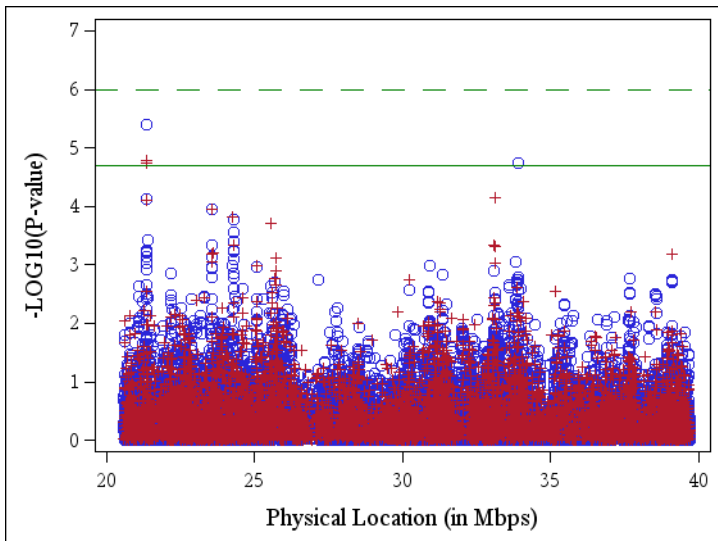

## +10 Medication Adjusted DBP

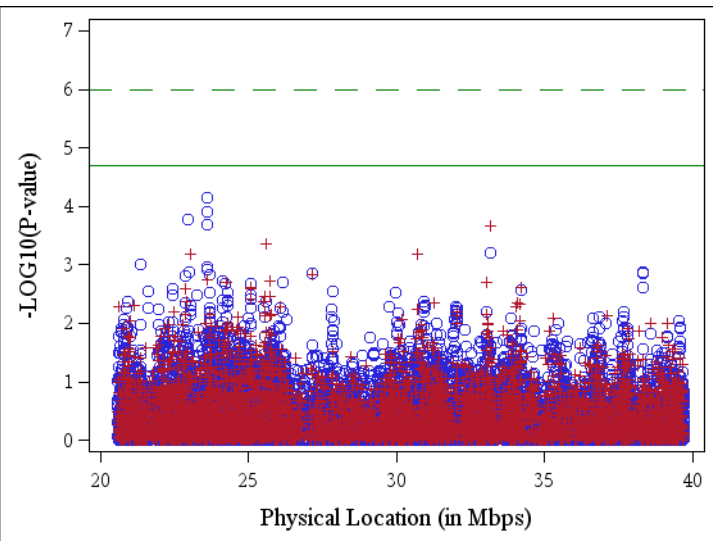

## +15/10 Medication Adjusted MAP

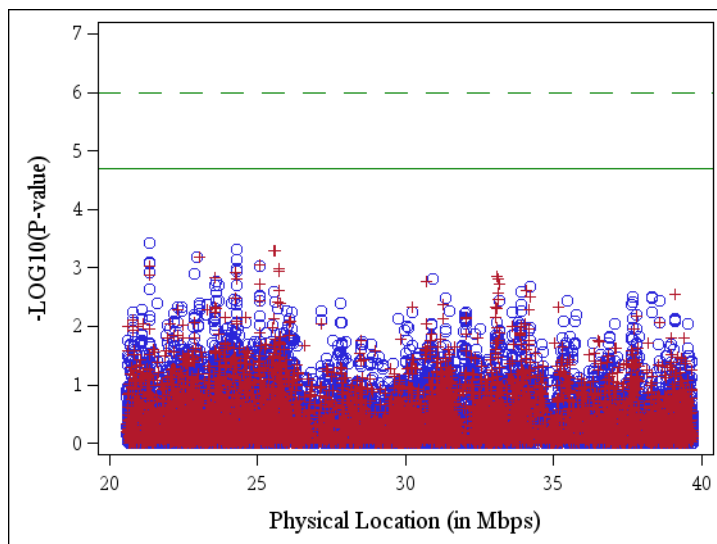

# Association of Chromosome 6 With Blood Pressure Phenotypes in European Americans

## SBP

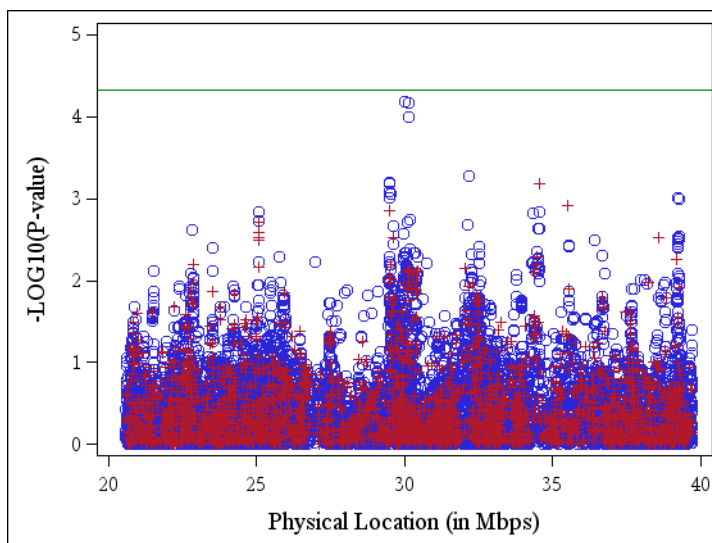

## DBP

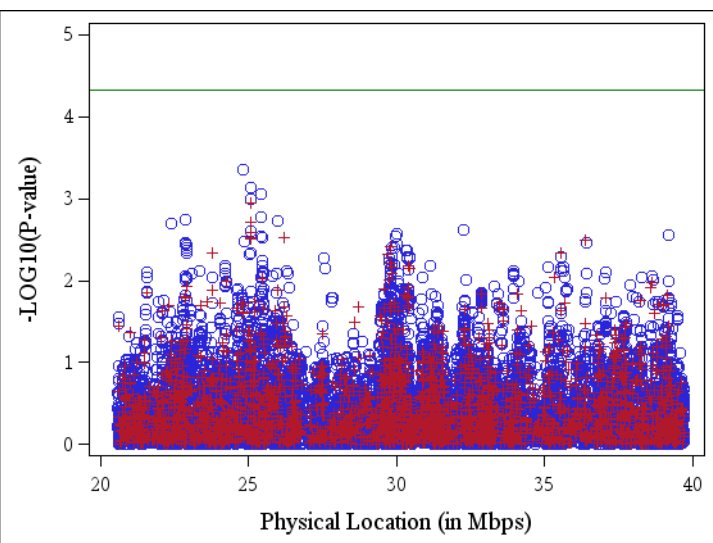

## MAP

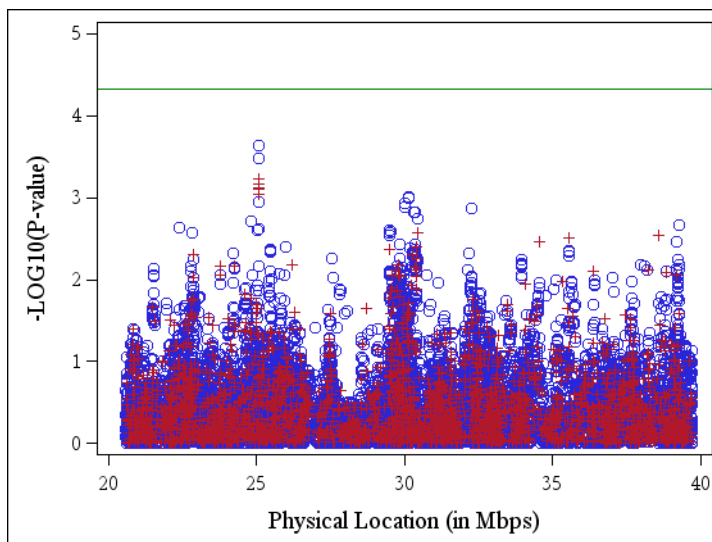

## PP

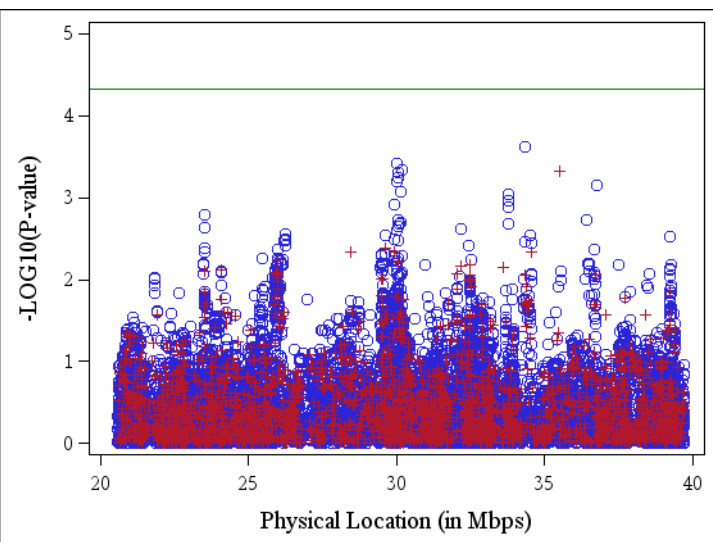

## +10 Medication Adjusted SBP

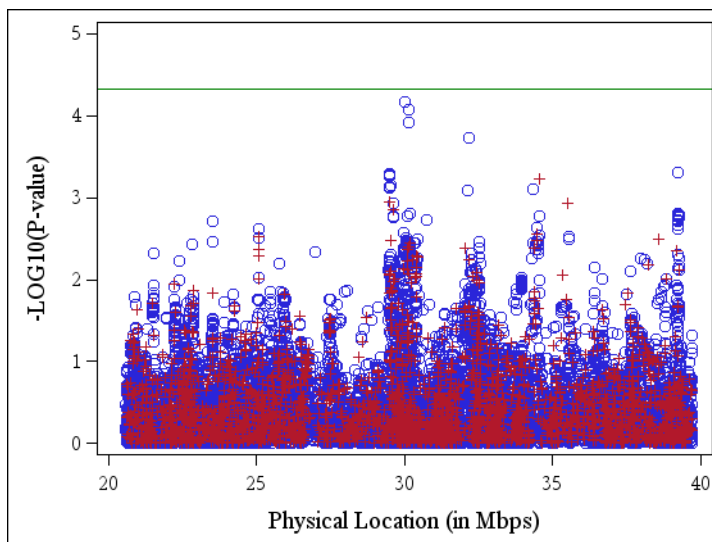

## +5 Medication Adjusted DBP

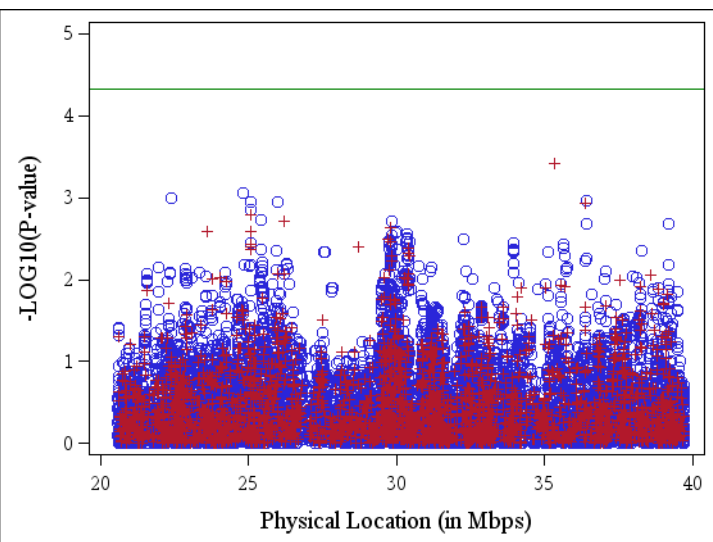

**Continued: Association of Chromosome 6 With Blood Pressure Phenotypes in European Americans**

**+10/5 Medication Adjusted MAP**

**Medication Adjusted PP**

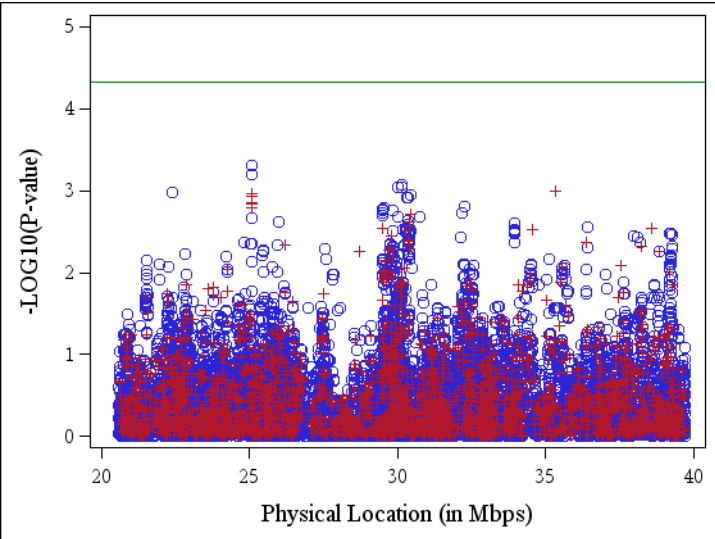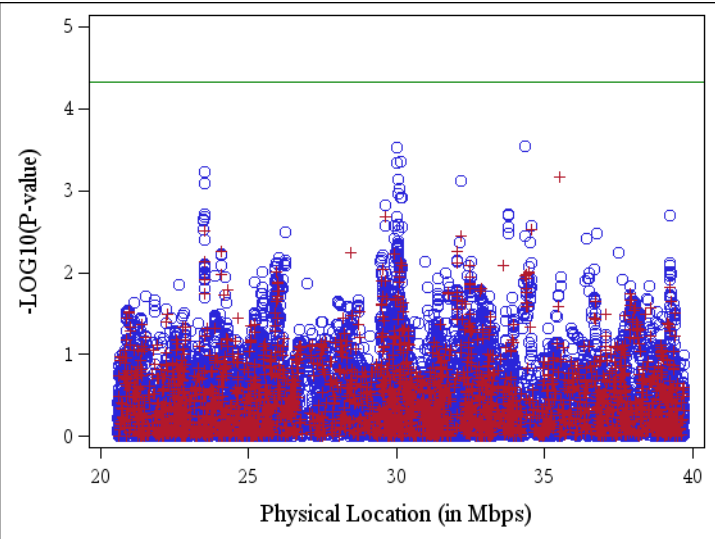

**+15 Medication Adjusted SBP**

**+10 Medication Adjusted DBP**

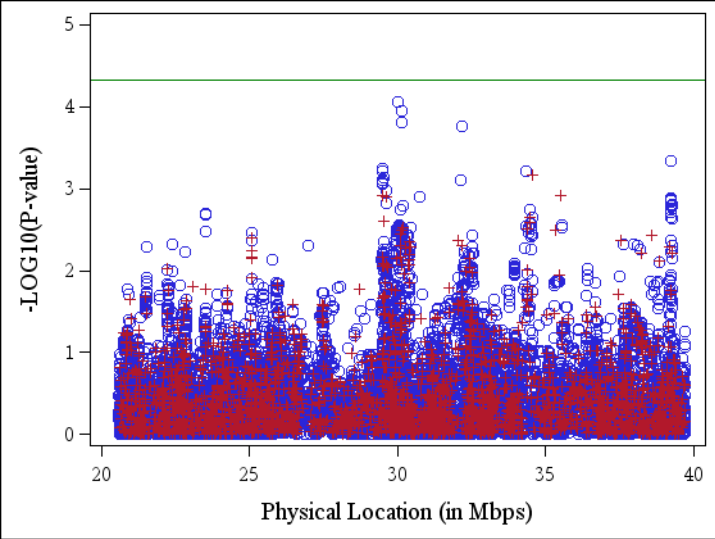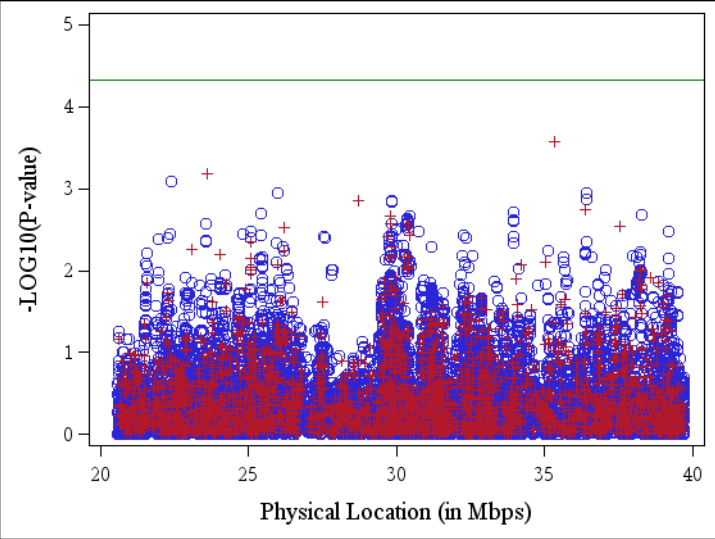

**+15/10 Medication Adjusted MAP**

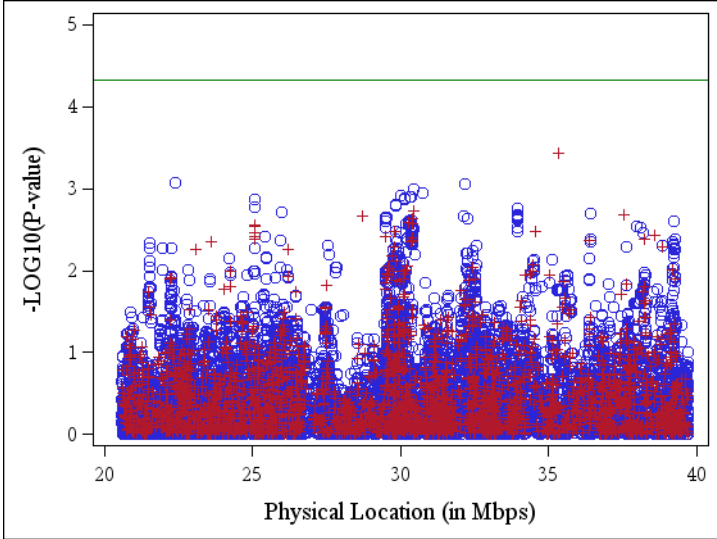

# Association of Chromosome 8 With Blood Pressure Phenotypes in African Americans

**SBP**

**DBP**

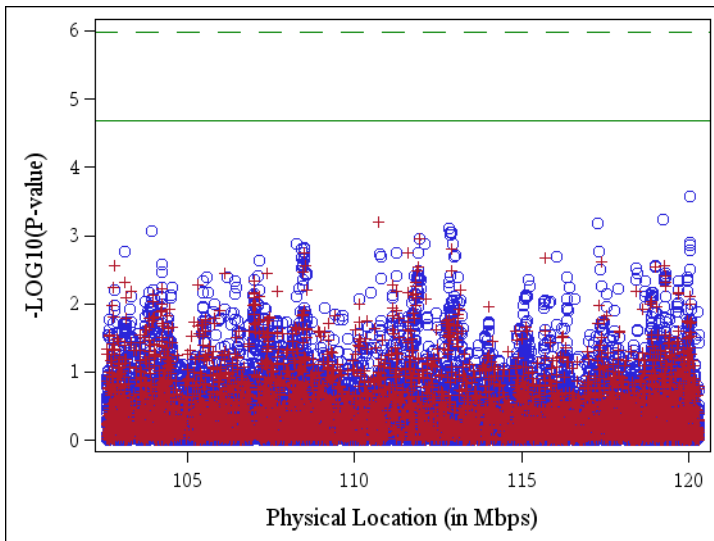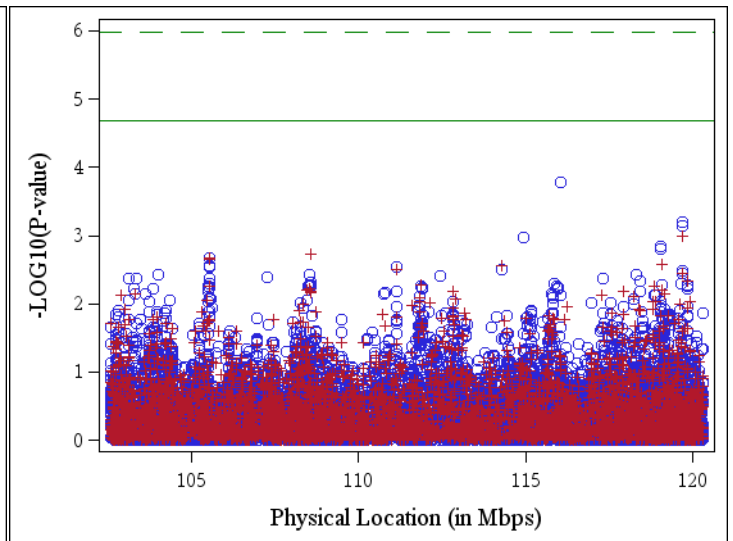

**MAP**

**PP**

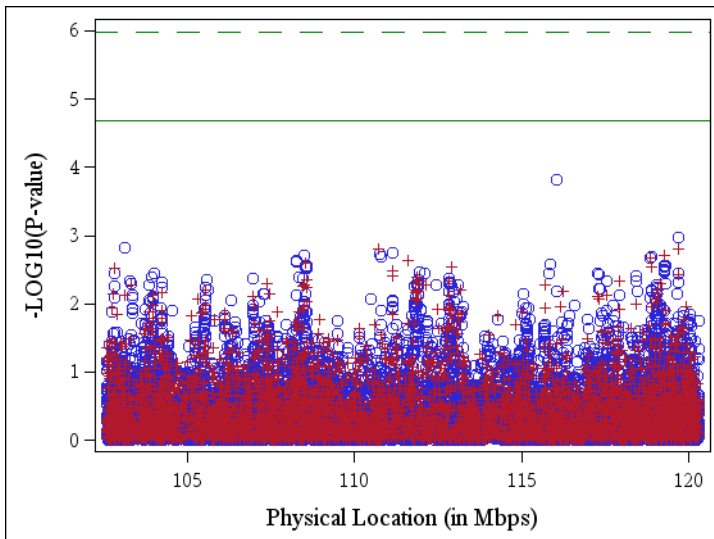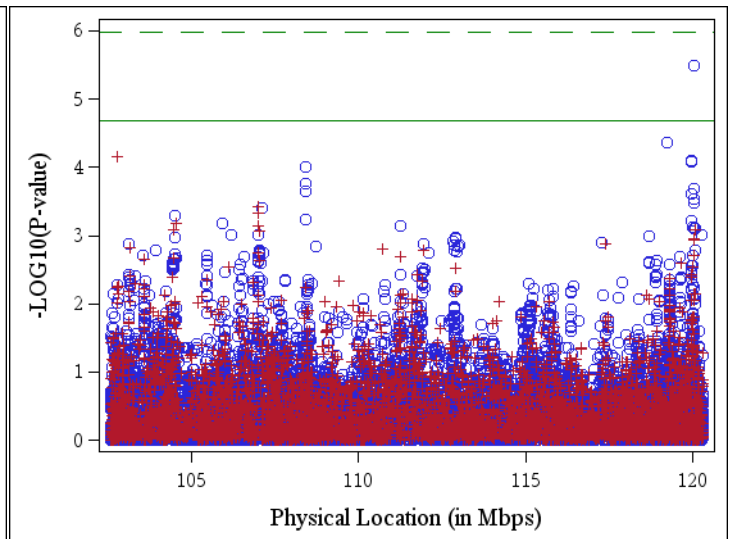

**+10 Medication Adjusted SBP**

**+5 Medication Adjusted DBP**

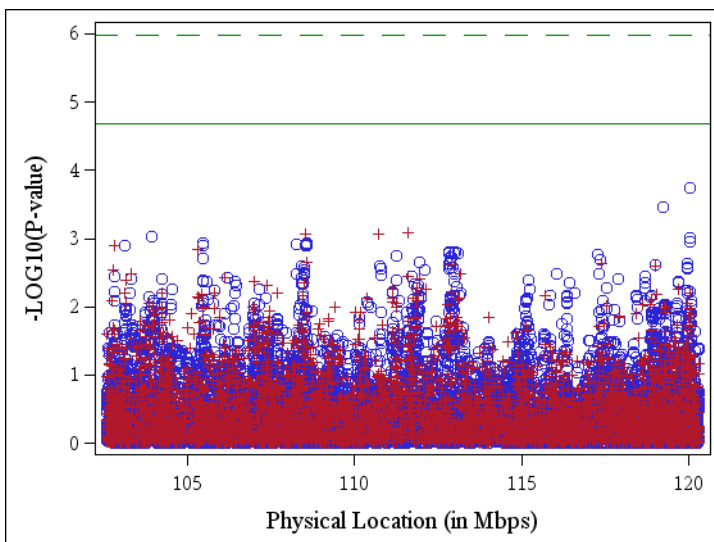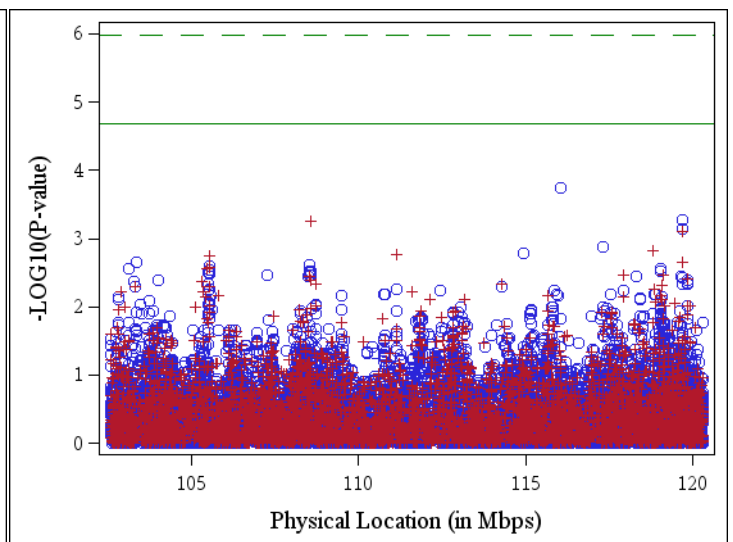

# Continued: Association of Chromosome 8 With Blood Pressure Phenotypes in African Americans

## +10/5 Medication Adjusted MAP

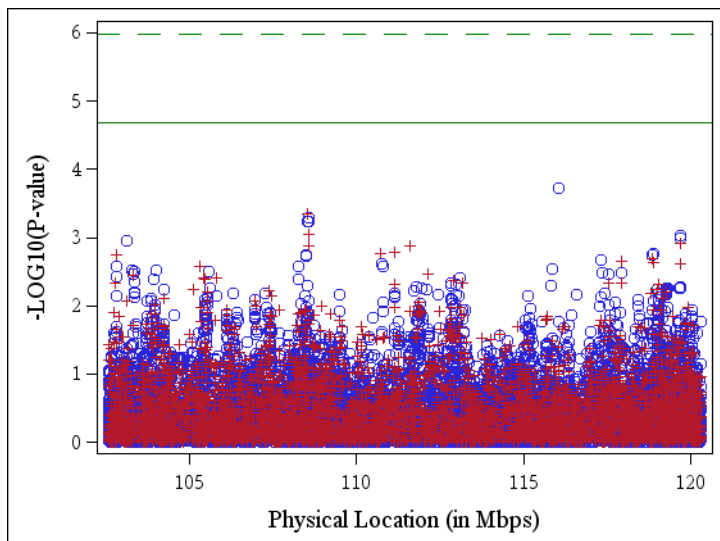

## Medication Adjusted PP

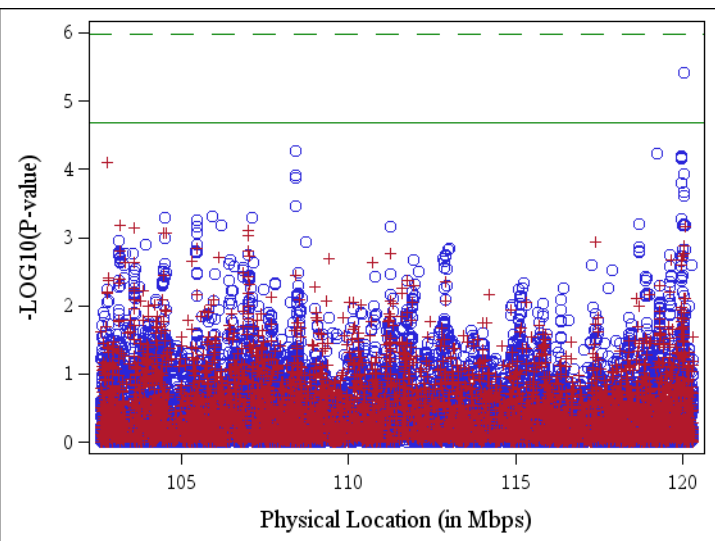

## +15 Medication Adjusted SBP

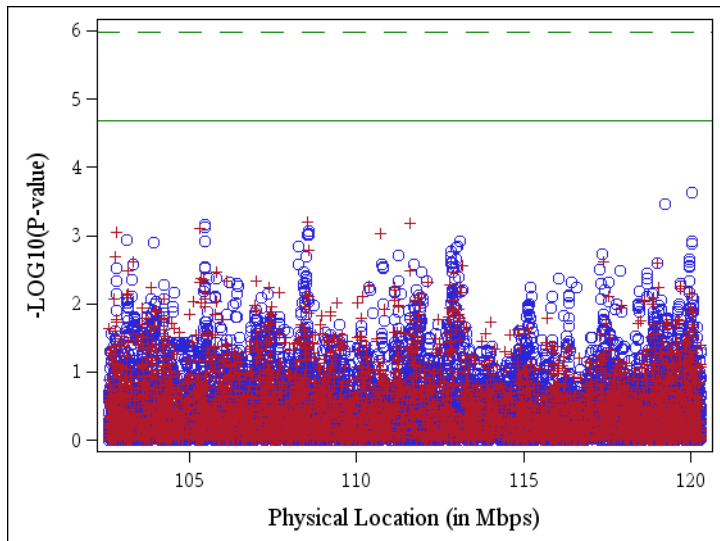

## +10 Medication Adjusted DBP

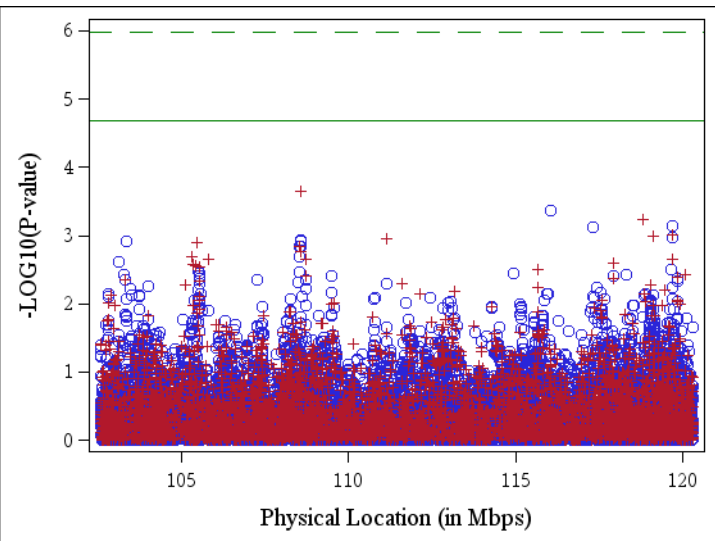

## +15/10 Medication Adjusted MAP

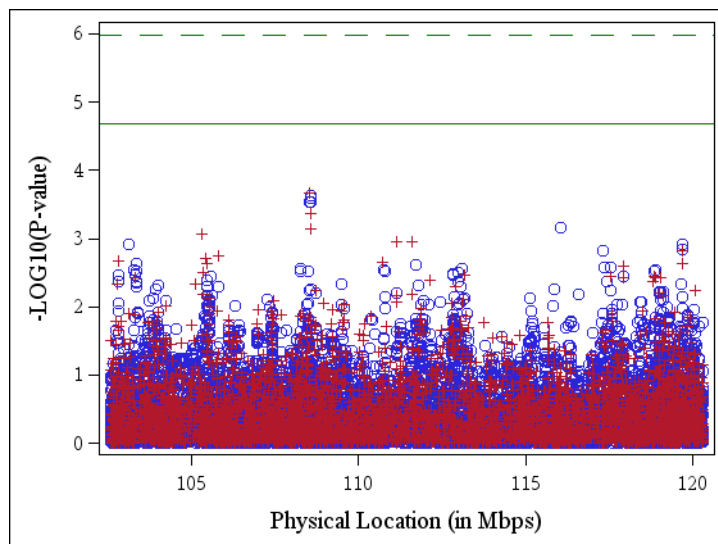

# Association of Chromosome 8 With Blood Pressure Phenotypes in European Americans

## SBP

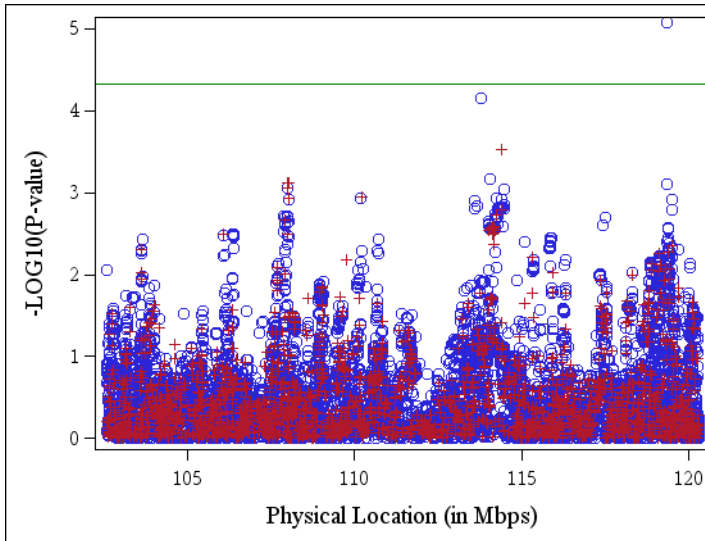

## DBP

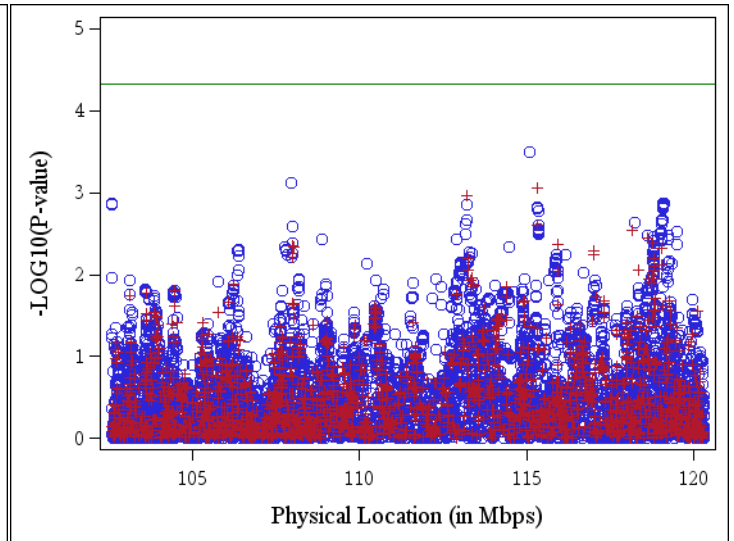

## MAP

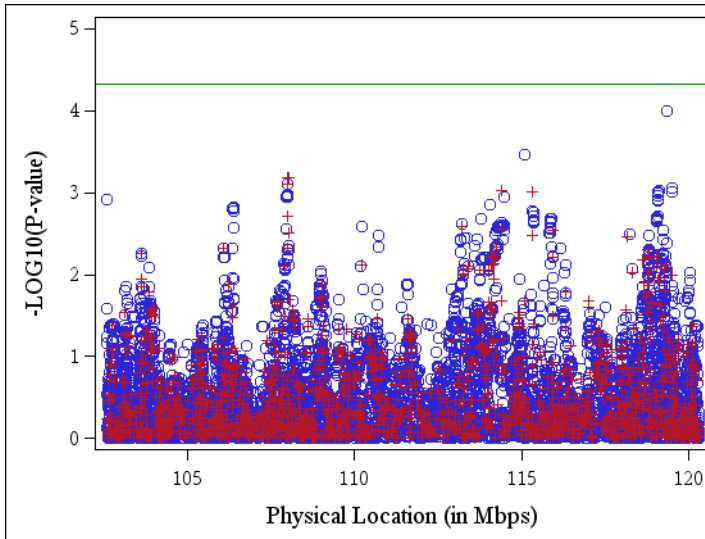

## PP

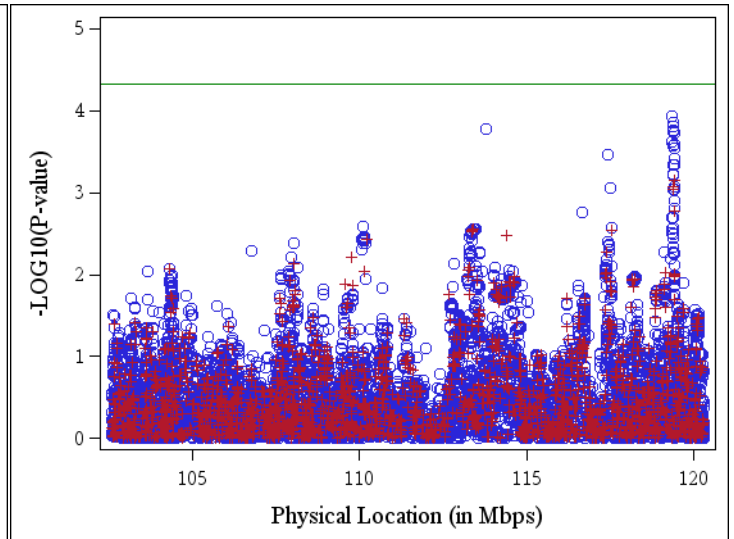

## +10 Medication Adjusted SBP

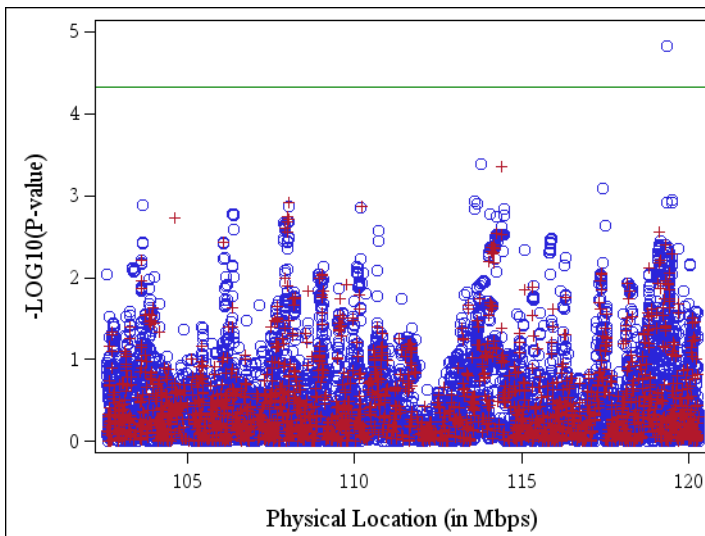

## +5 Medication Adjusted DBP

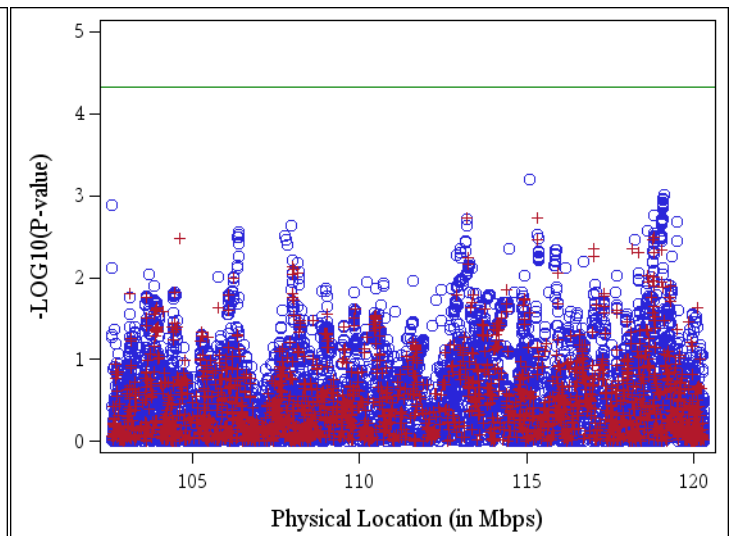

**Continued: Association of Chromosome 8 With Blood Pressure Phenotypes in European Americans**

**+10/5 Medication Adjusted MAP**

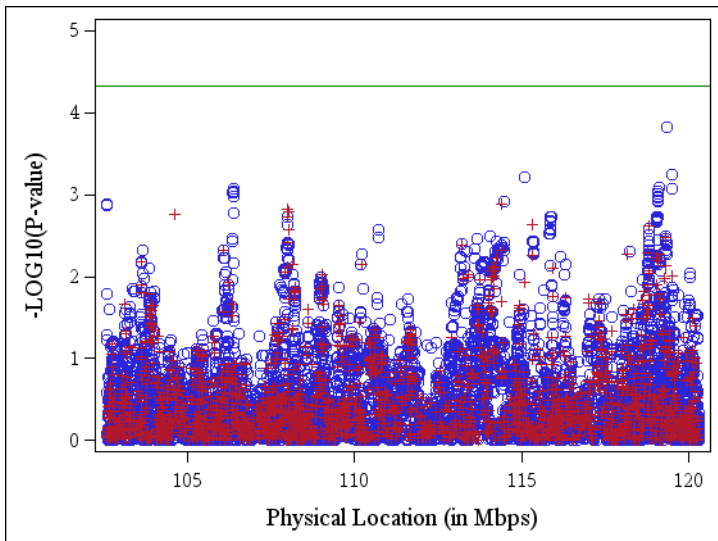

**Medication Adjusted PP**

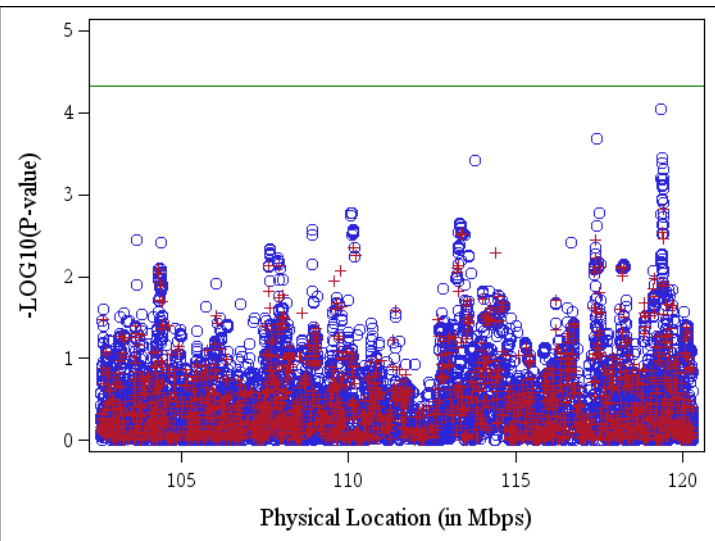

**+15 Medication Adjusted SBP**

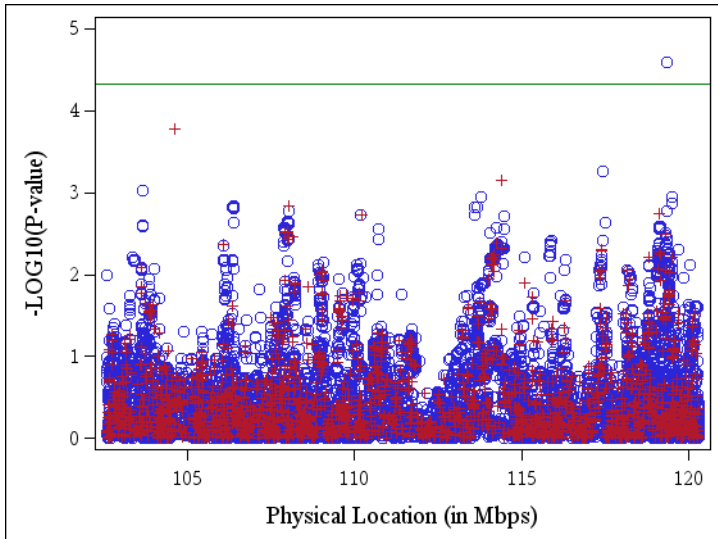

**+10 Medication Adjusted DBP**

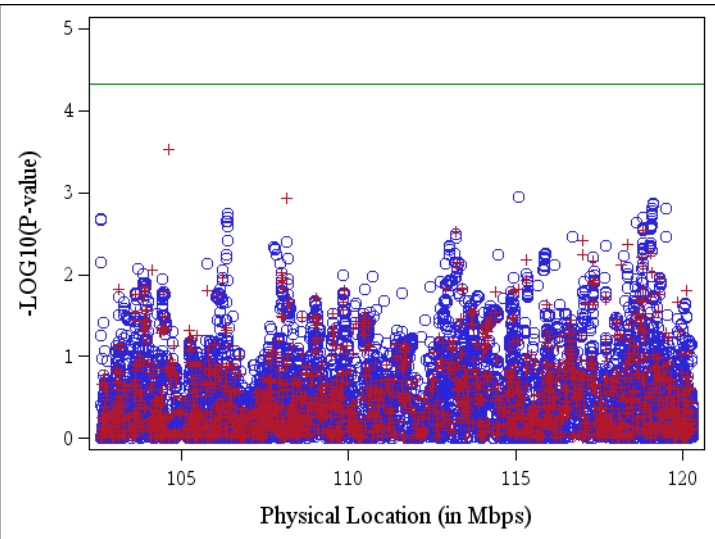

**+15/10 Medication Adjusted MAP**

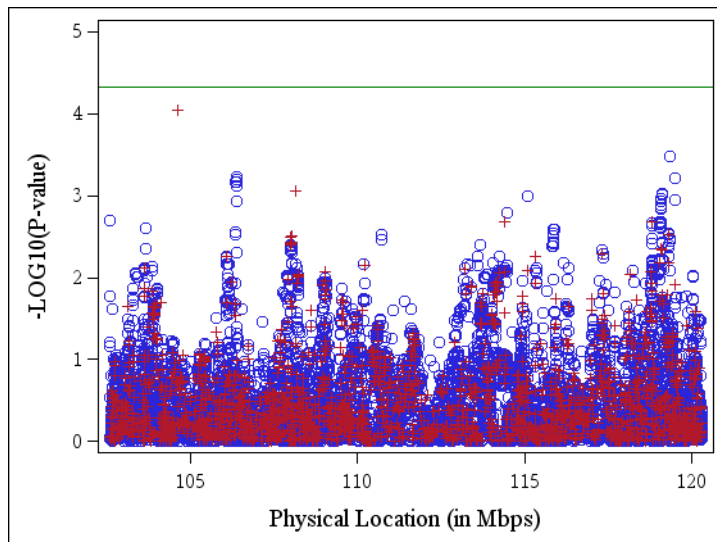



# Association of Chromosome 20 With Blood Pressure Phenotypes in African Americans

## SBP

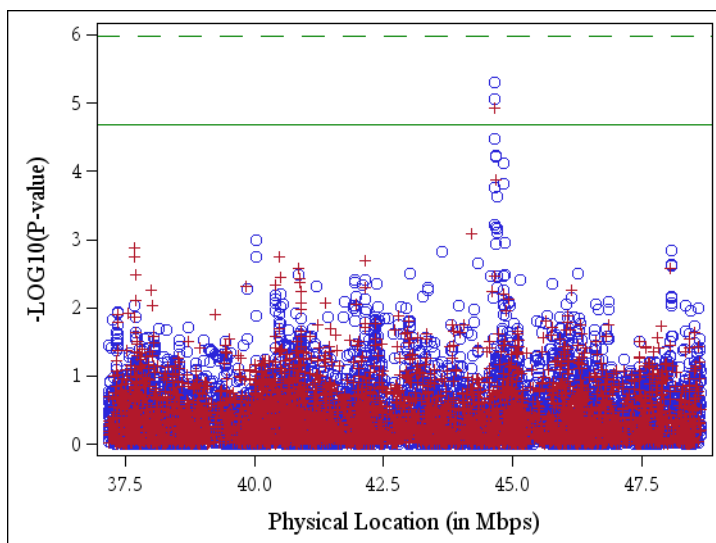

## DBP

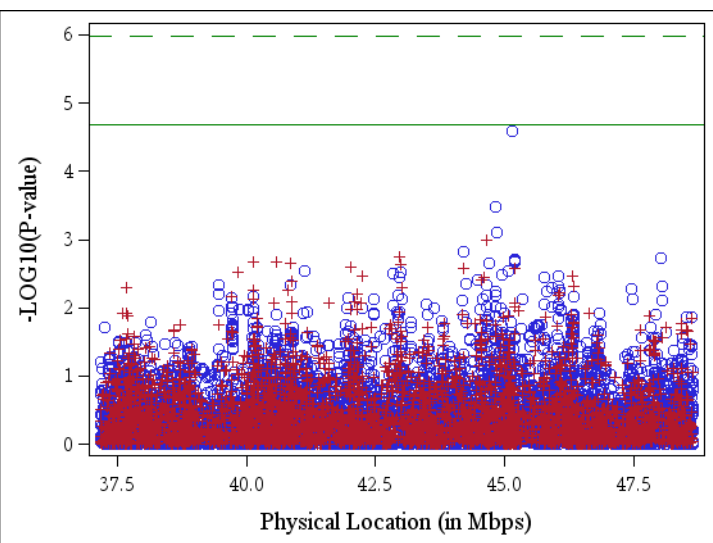

## MAP

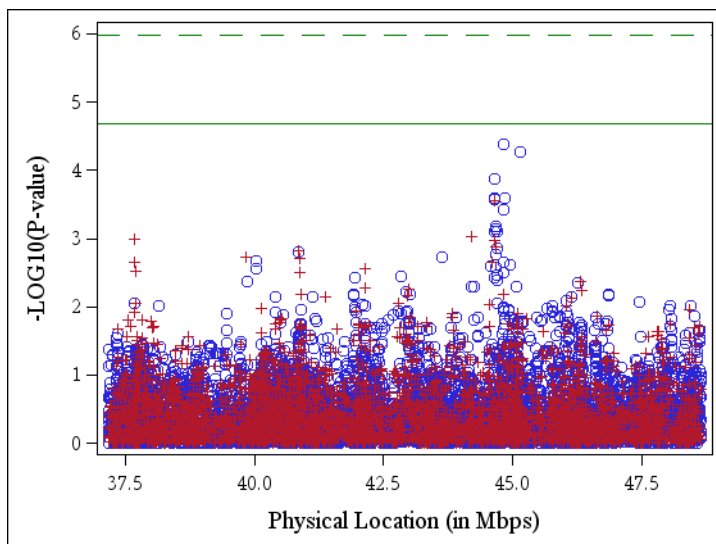

## PP

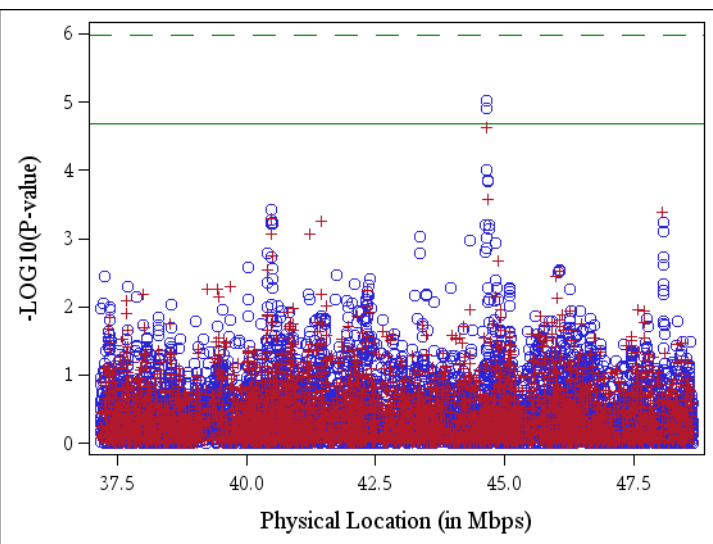

## +10 Medication Adjusted SBP

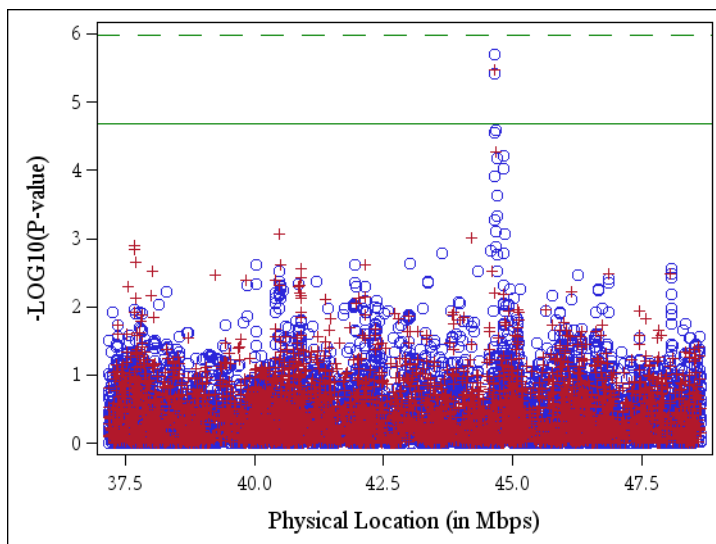

## +5 Medication Adjusted DBP

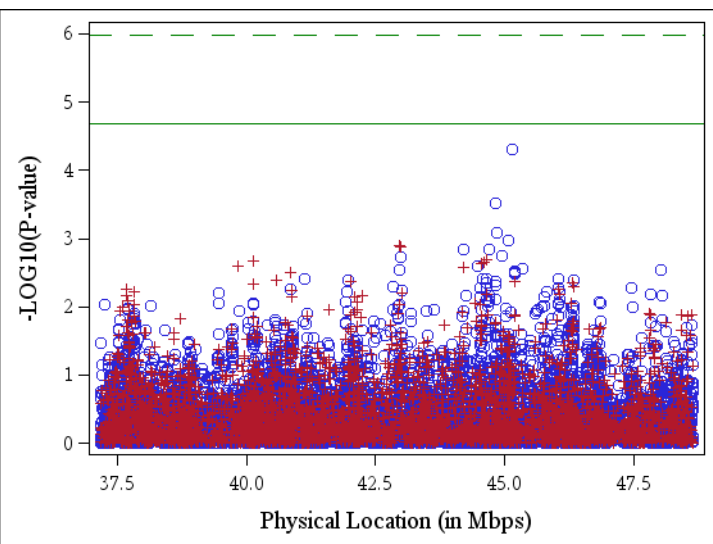

# Continued: Association of Chromosome 20 With Blood Pressure Phenotypes in African Americans

## +10/5 Medication Adjusted MAP

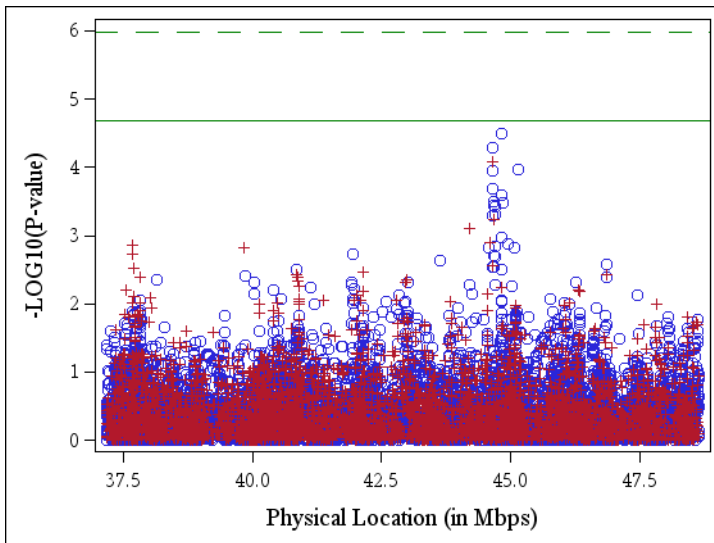

## Medication Adjusted PP

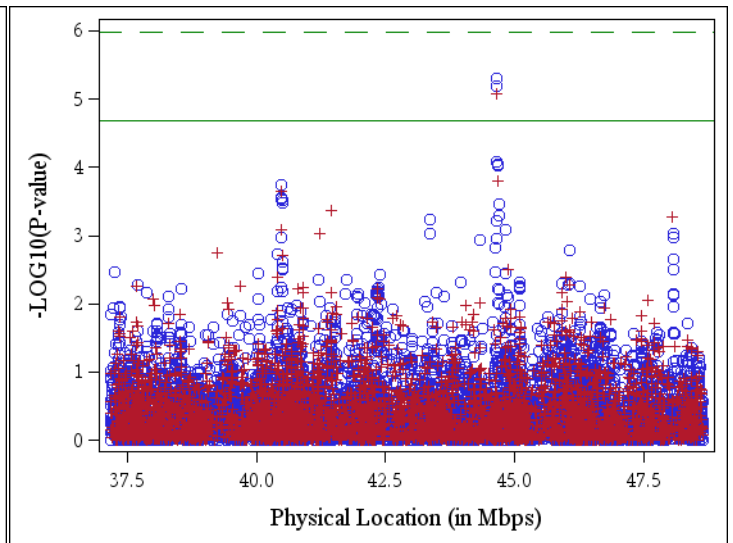

## +15 Medication Adjusted SBP

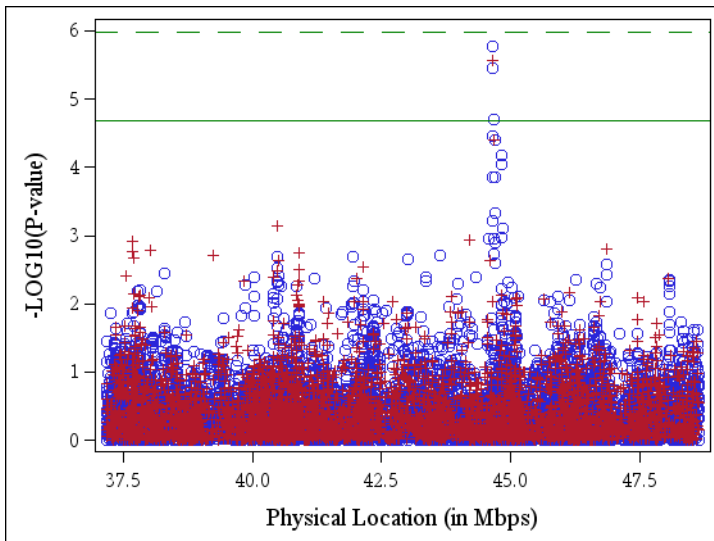

## +10 Medication Adjusted DBP

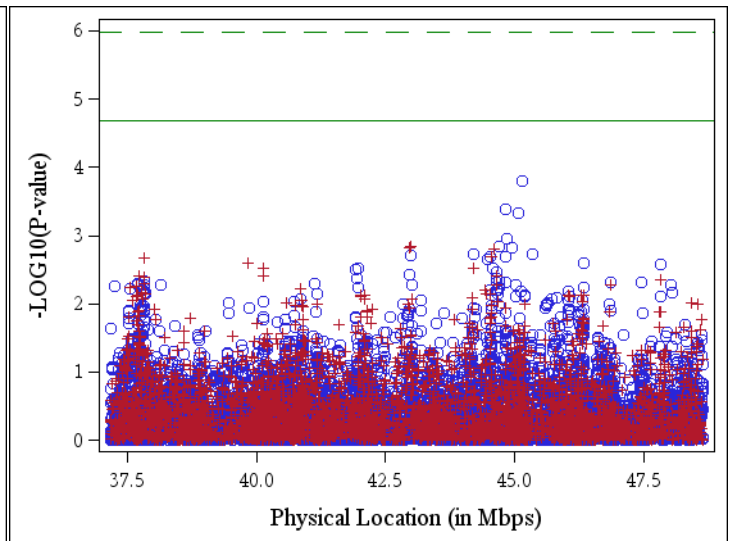

## +15/10 Medication Adjusted MAP

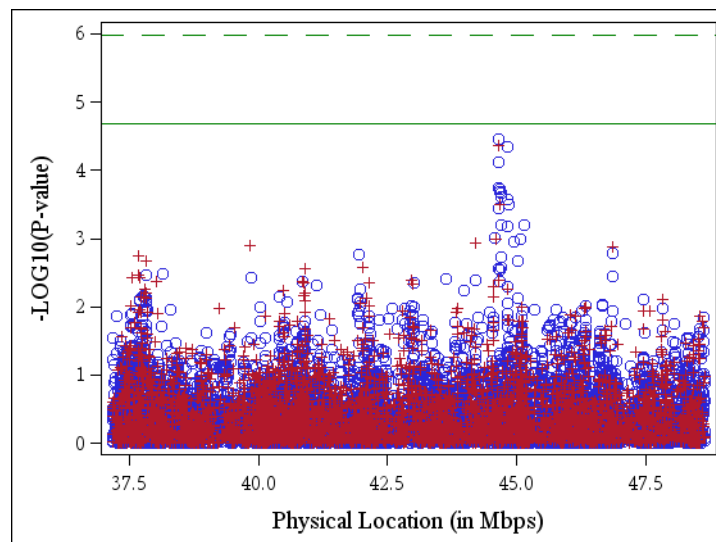

# Association of Chromosome 20 With Blood Pressure Phenotypes in European Americans

SBP

DBP

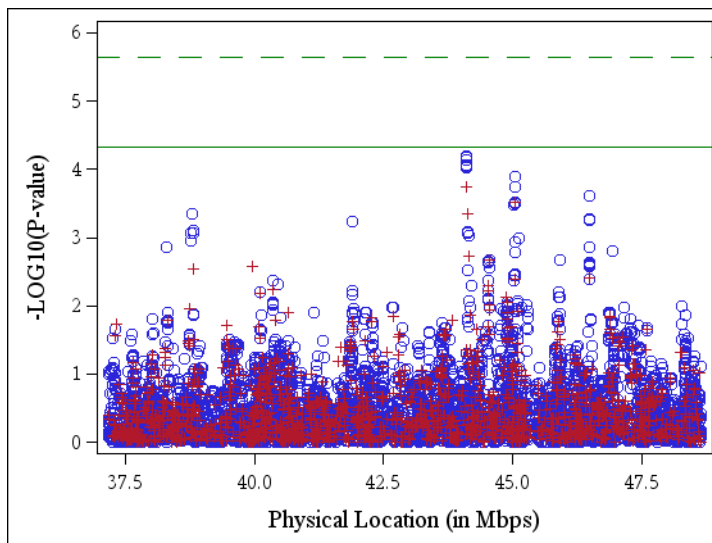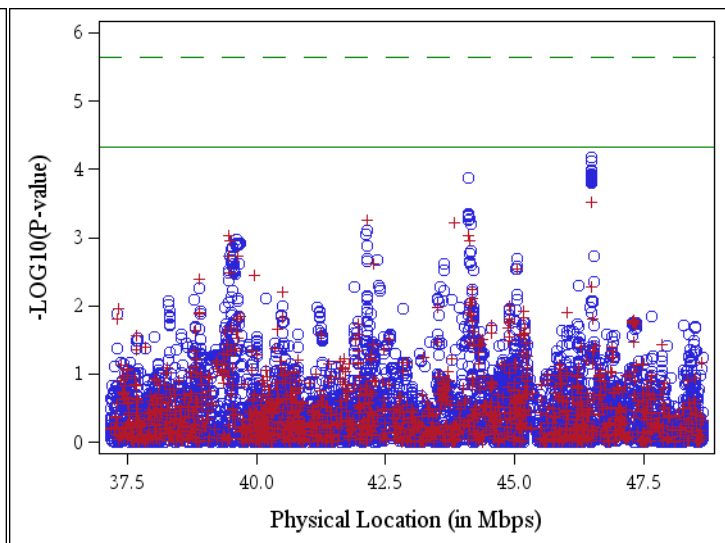

MAP

PP

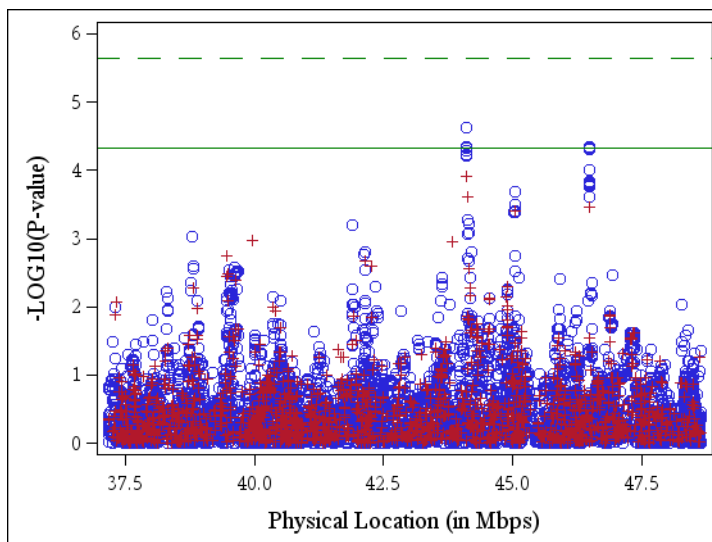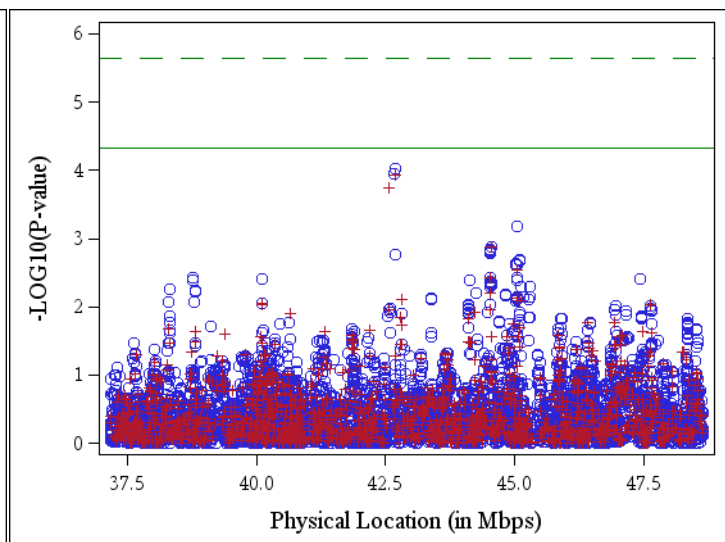

+10 Medication Adjusted SBP

+5 Medication Adjusted DBP

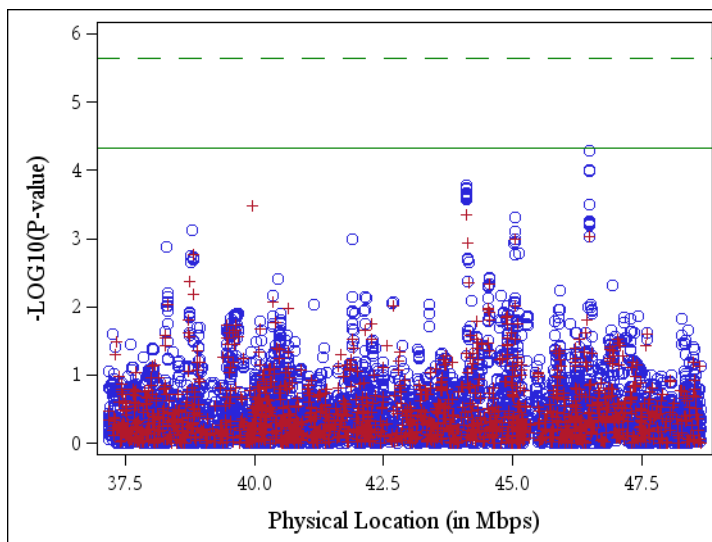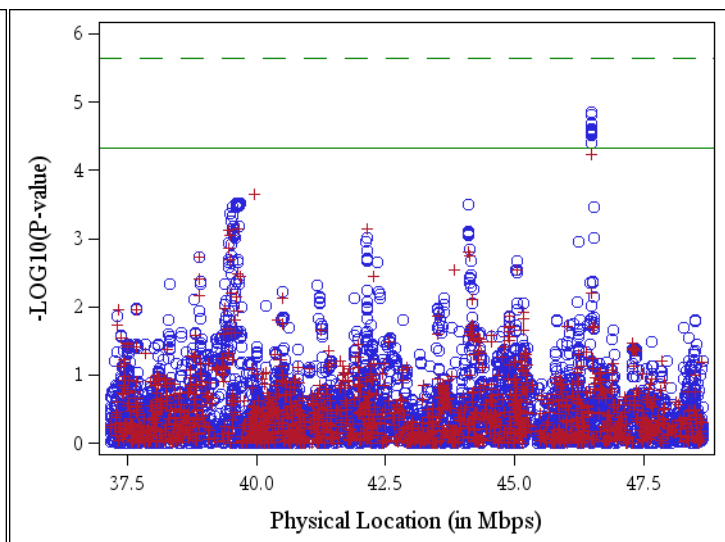

# Continued: Association of Chromosome 20 With Blood Pressure Phenotypes in European Americans

## +10/5 Medication Adjusted MAP

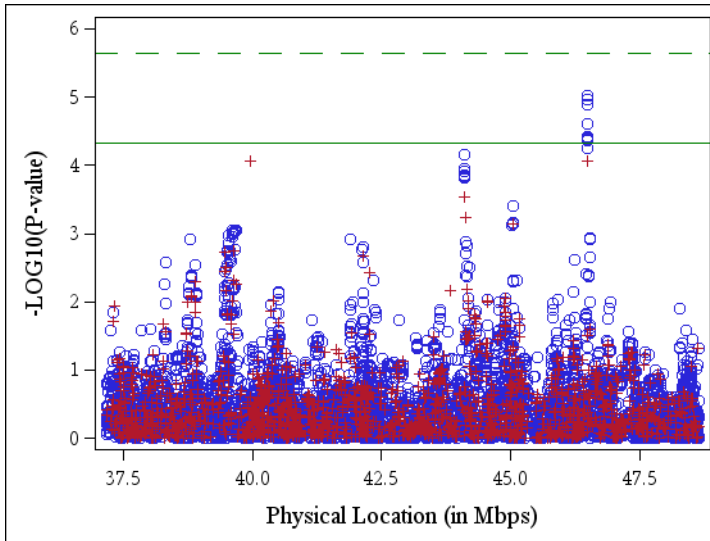

## Medication Adjusted PP

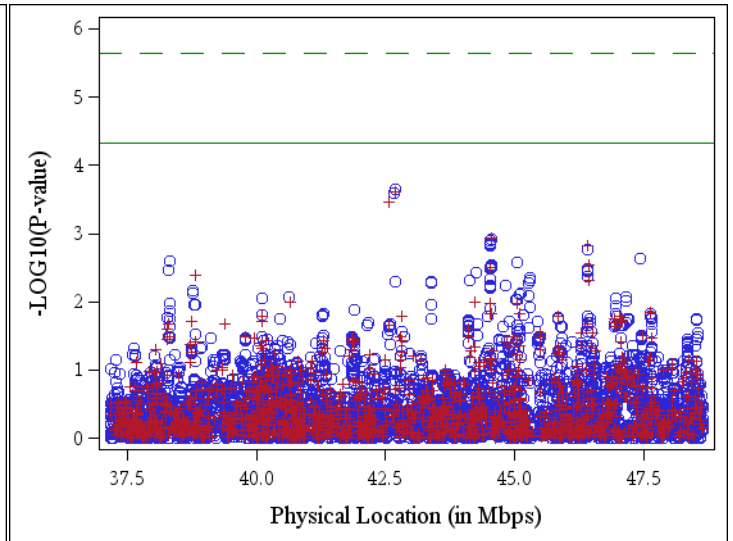

## +15 Medication Adjusted SBP

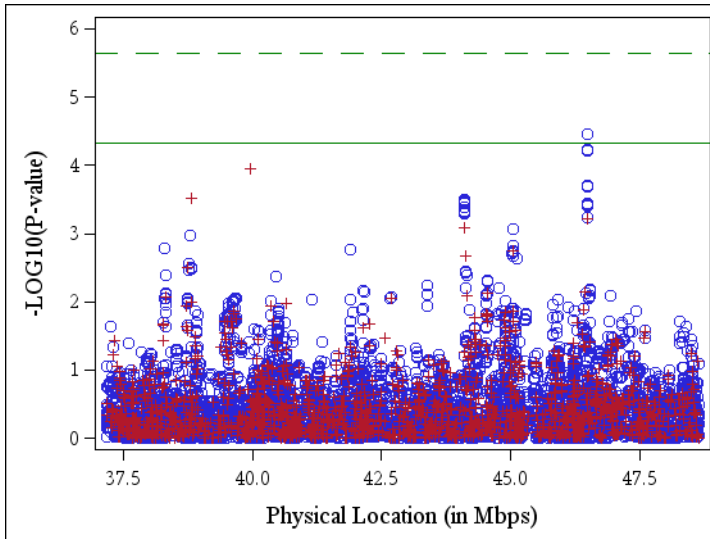

## +10 Medication Adjusted DBP

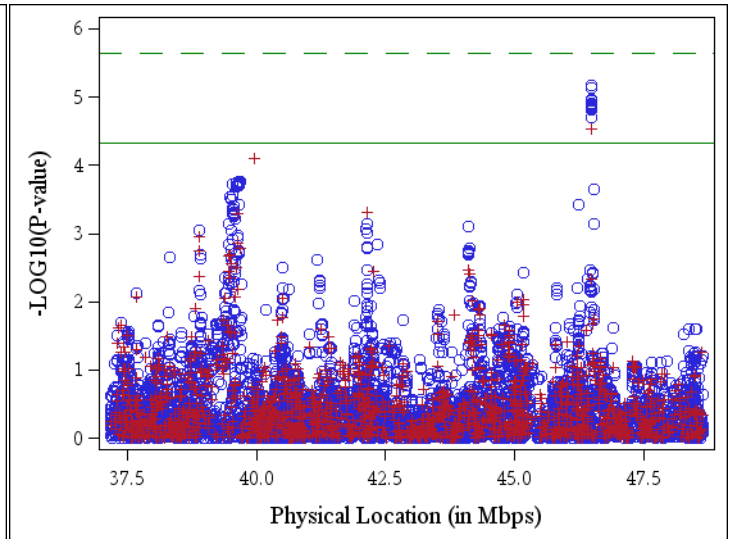

## +15/10 Medication Adjusted MAP

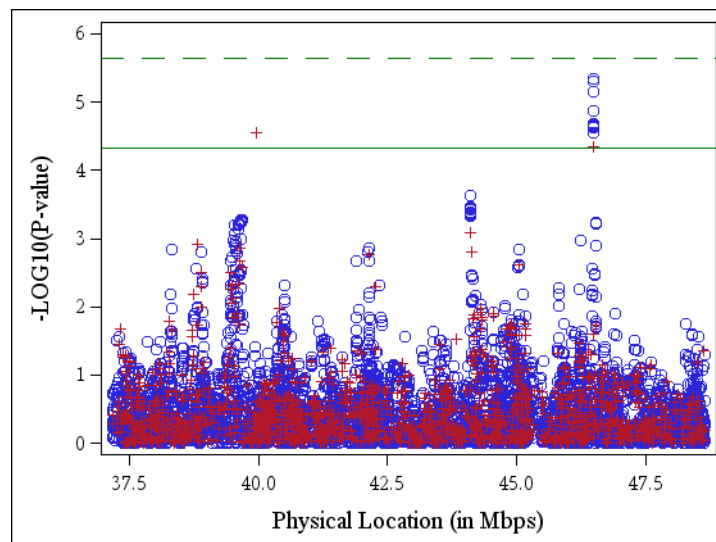

# Association of Chromosome 21 With Blood Pressure Phenotypes in African Americans

SBP

DBP

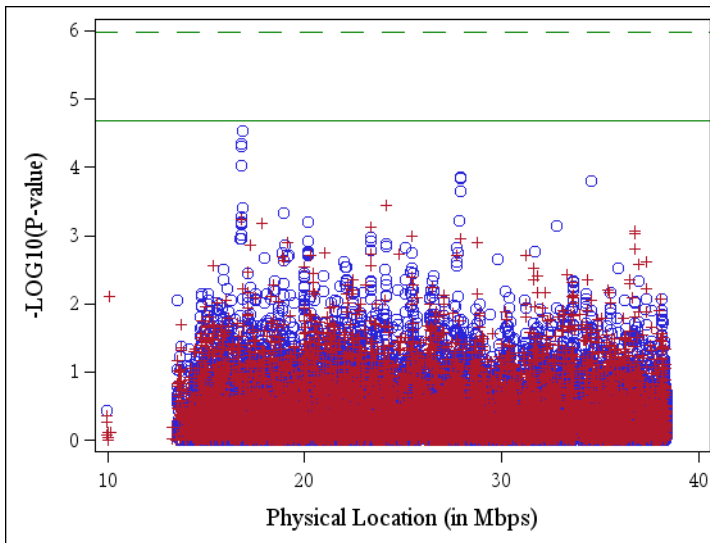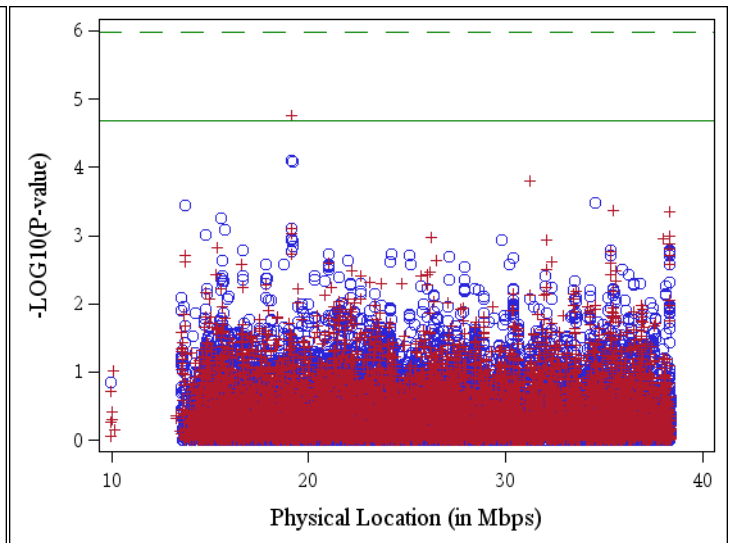

MAP

PP

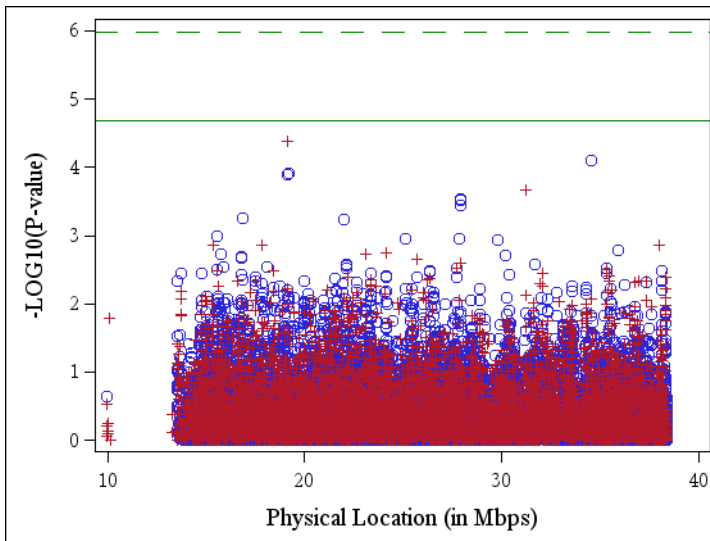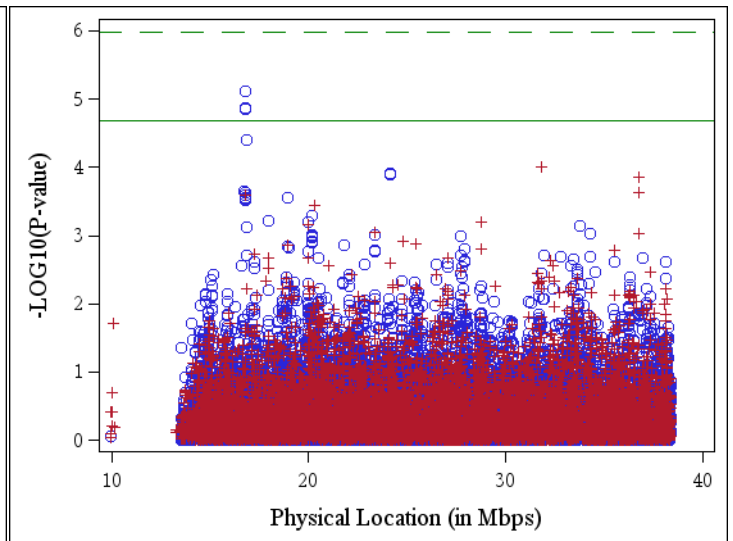

+10 Medication Adjusted SBP

+5 Medication Adjusted DBP

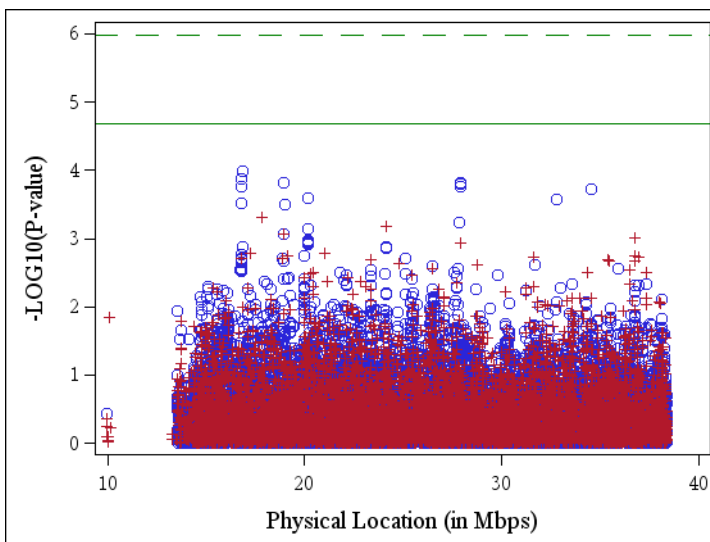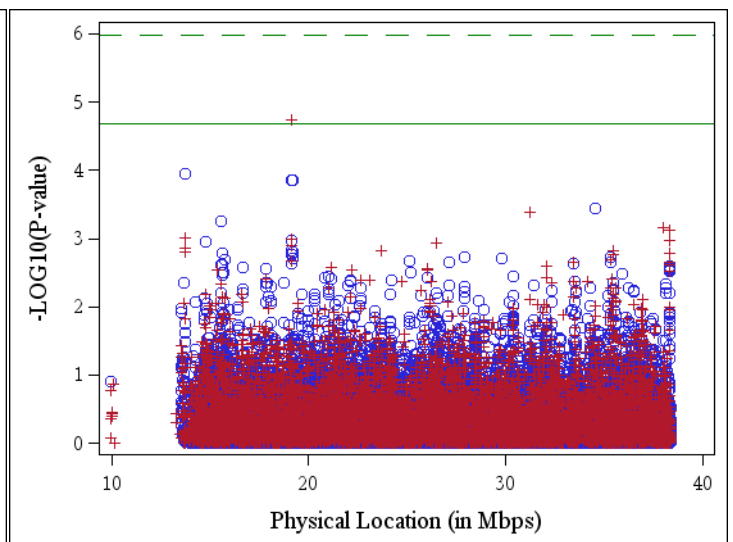

# Continued: Association of Chromosome 21 With Blood Pressure Phenotypes in African Americans

## +10/5 Medication Adjusted MAP

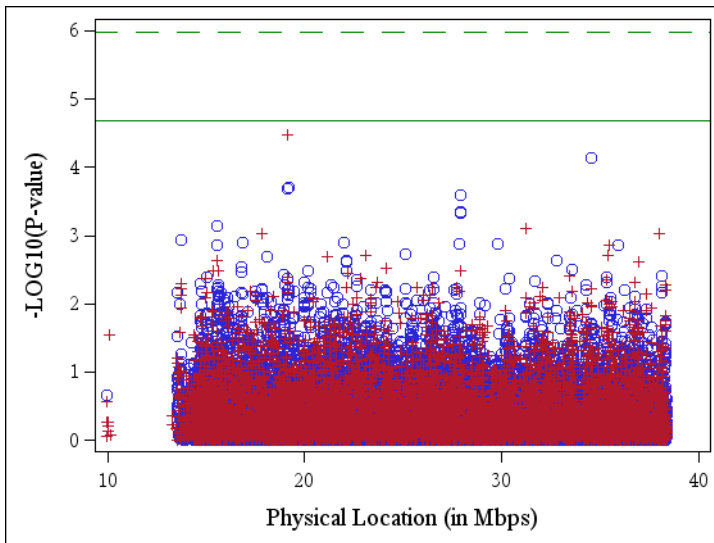

## Medication Adjusted PP

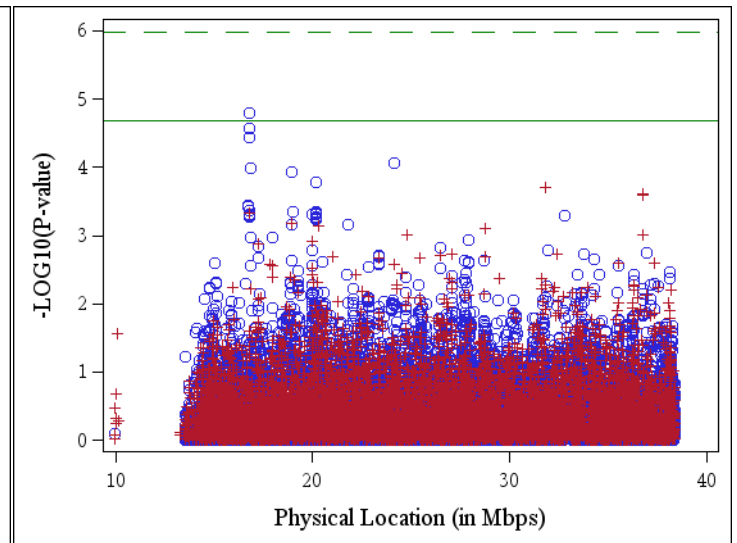

## +15 Medication Adjusted SBP

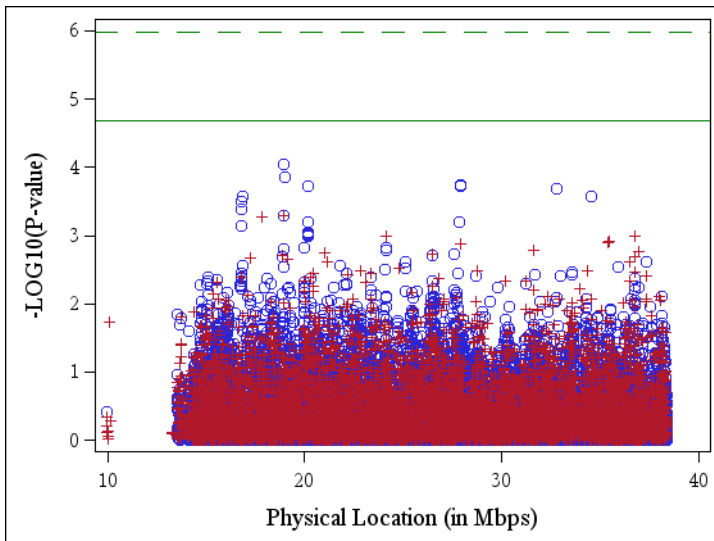

## +10 Medication Adjusted DBP

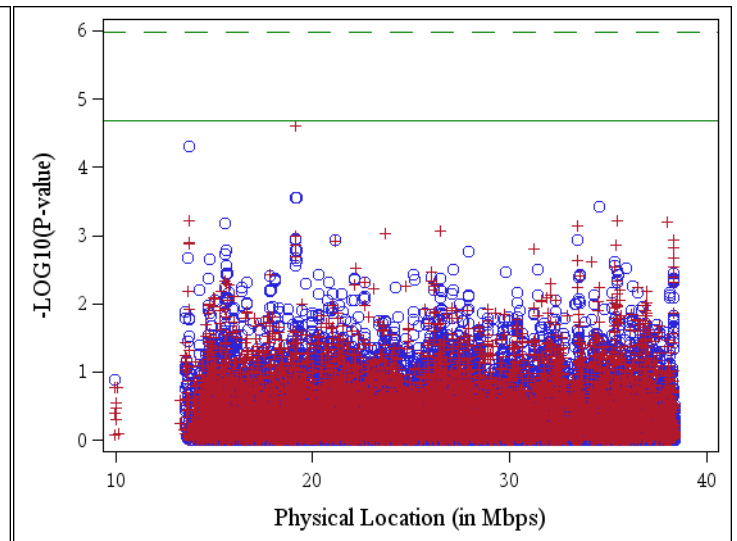

## +15/10 Medication Adjusted MAP

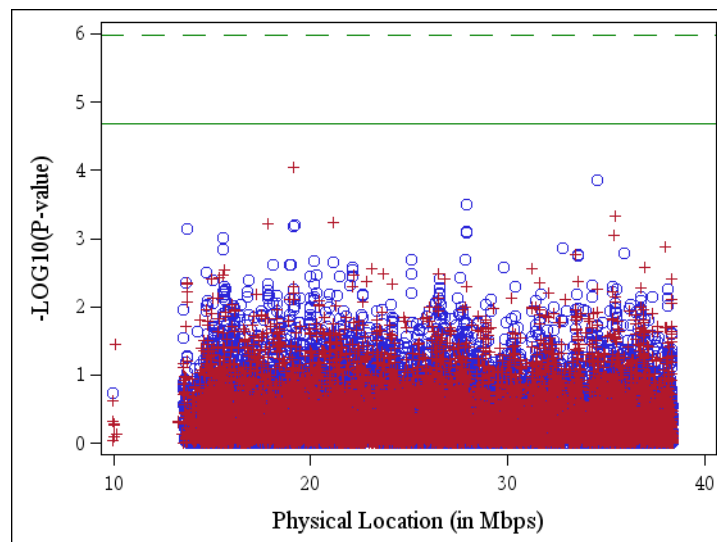

# Association of Chromosome 21 With Blood Pressure Phenotypes in European Americans

## SBP

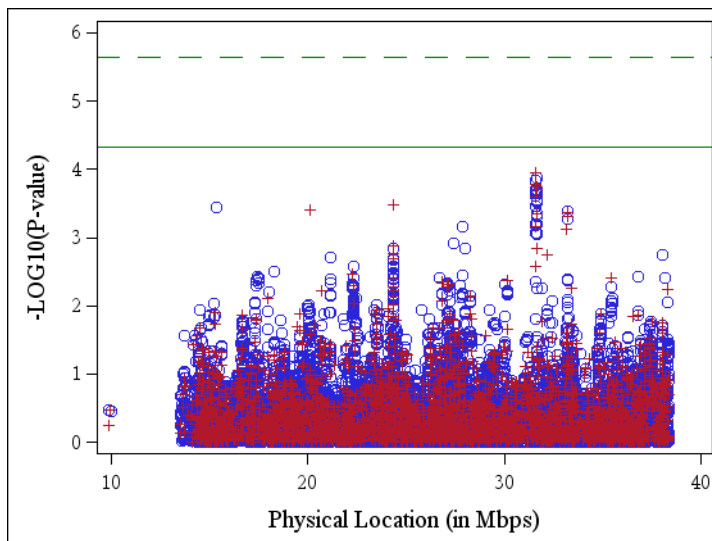

## DBP

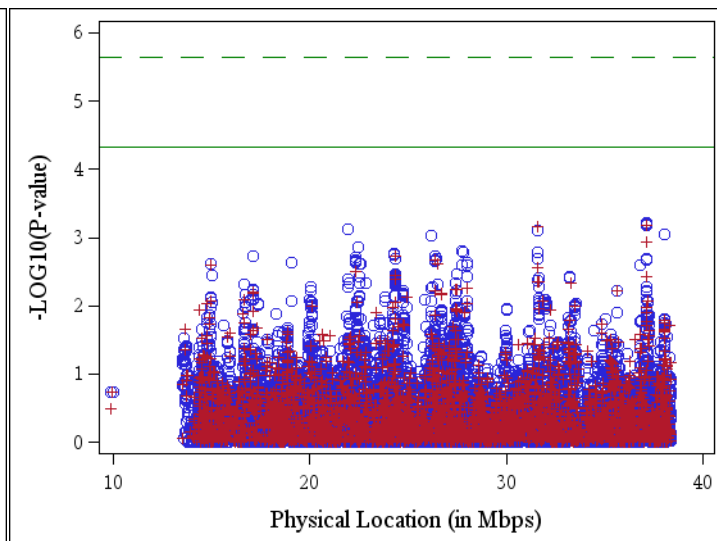

## MAP

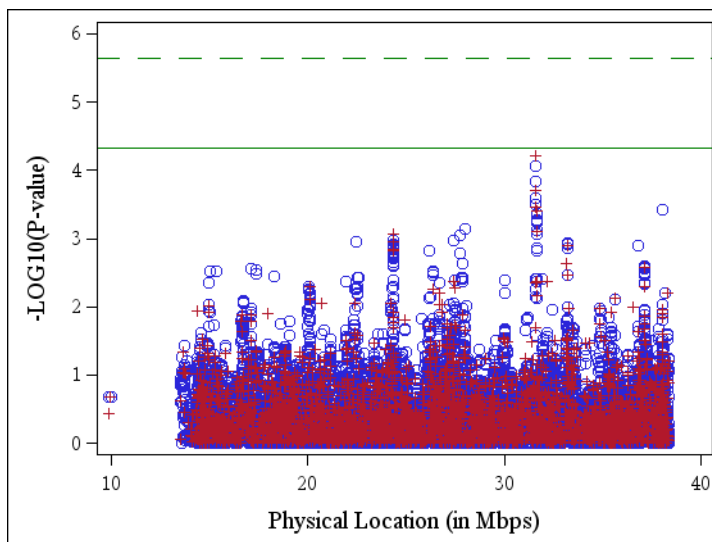

## PP

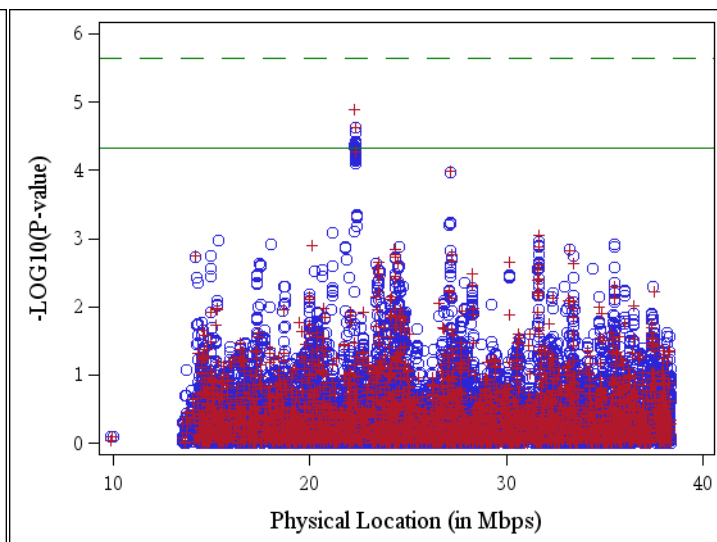

## +10 Medication Adjusted SBP

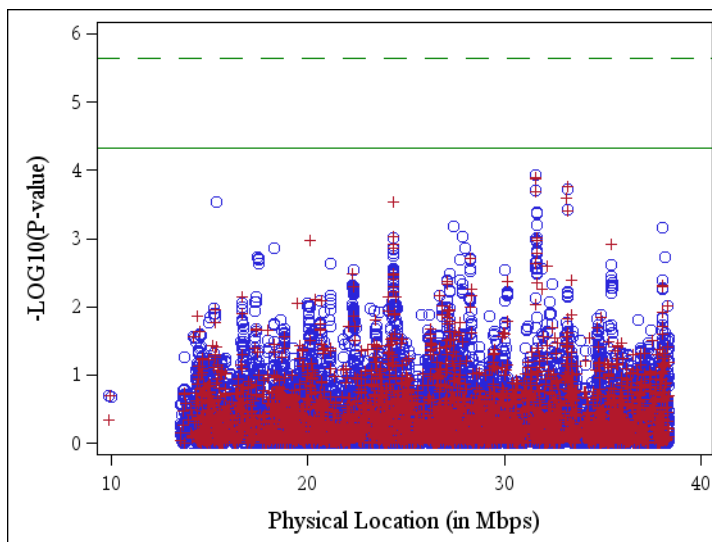

## +5 Medication Adjusted DBP

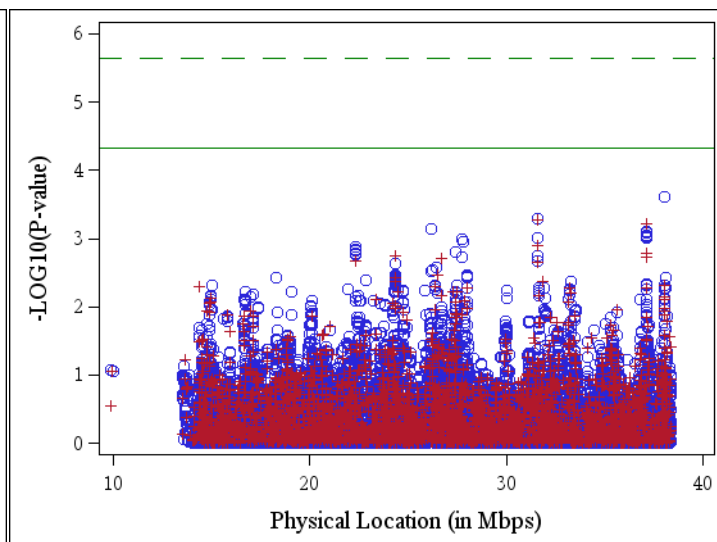

# Continued: Association of Chromosome 21 With Blood Pressure Phenotypes in European Americans

## +10/5 Medication Adjusted MAP

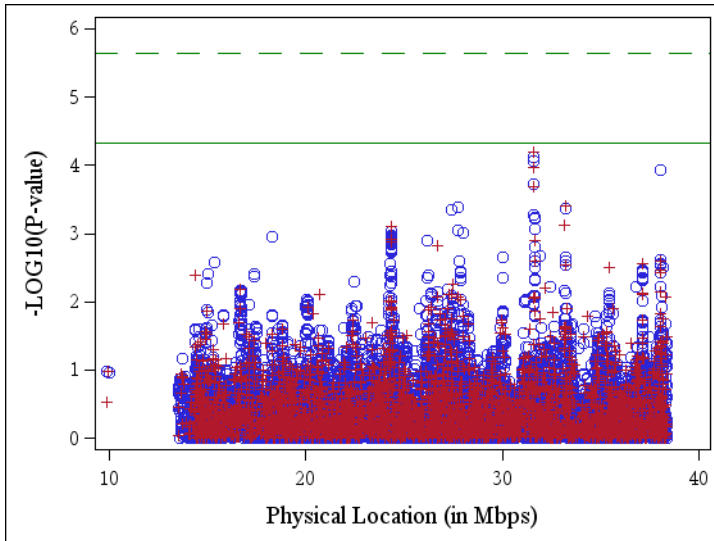

## Medication Adjusted PP

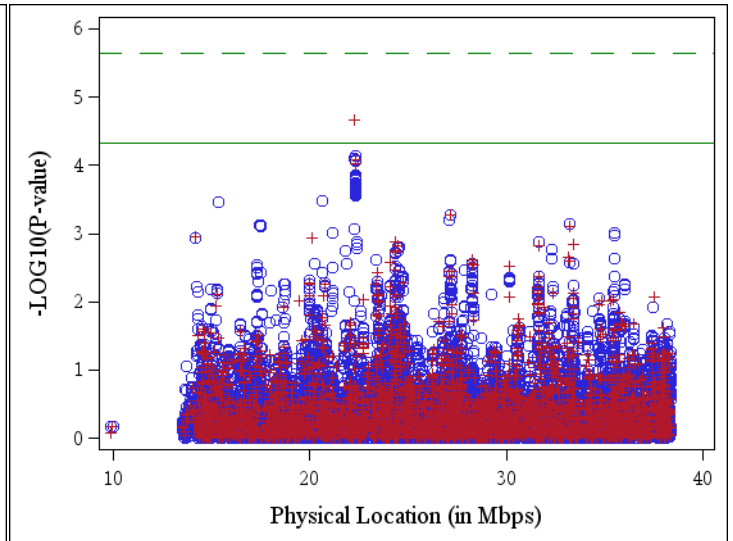

## +15 Medication Adjusted SBP

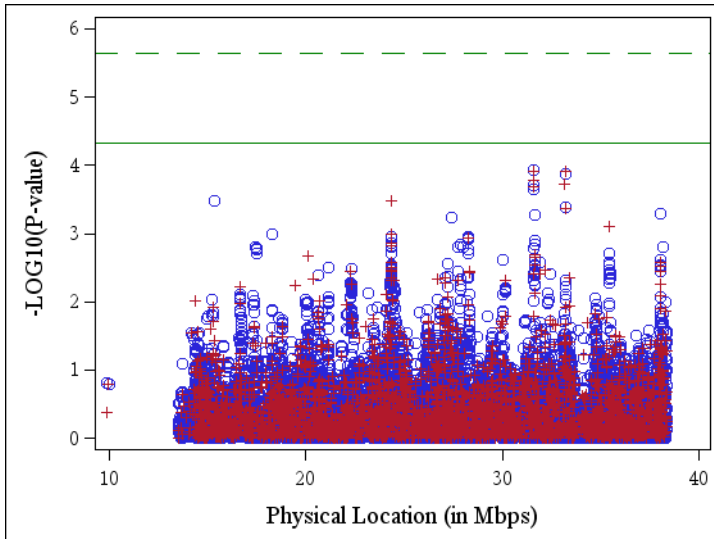

## +10 Medication Adjusted DBP

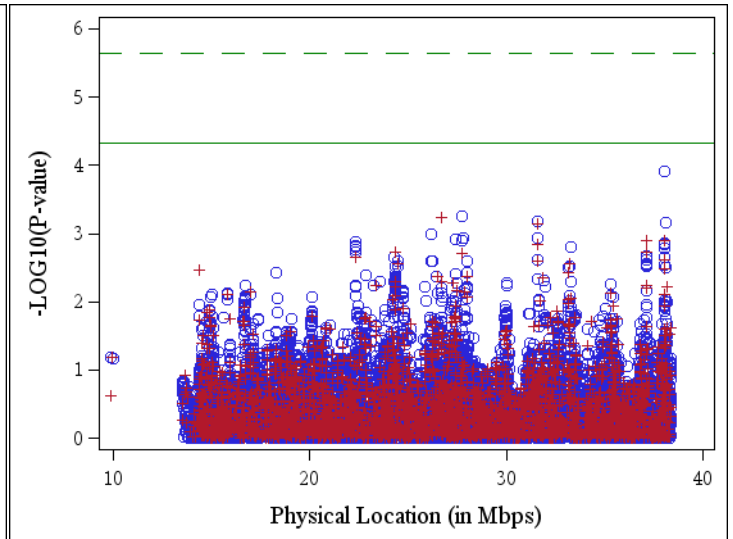

## +15/10 Medication Adjusted MAP

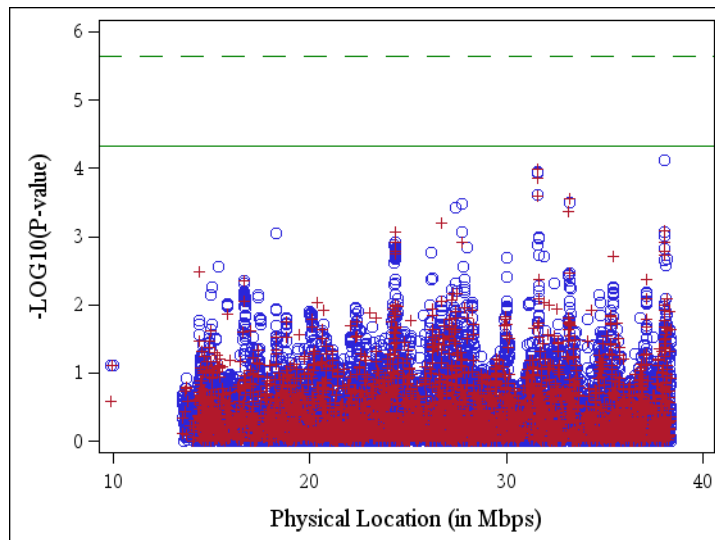

Supplement: NIHMS330739-supplement-Supp_Data_2.pdf [file NIHMS330739-supplement-Supp_Data_2.pdf]
